# Supplementary material for: Serum Metabolomics Analysis of Asthma in Different Inflammatory Phenotypes: A Cross-Sectional Study in Northeast China
Source: Hindawi journal article supplement (doi:10.1155/2018/2860521), 2018-09-23
Supplement: f1 [file 2860521.f1.pdf]

## SUPPLEMENTARY MATERIALS

**Table S1** Validation of systematic stability and suitability of UPLC-MS/MS

| Modes            | NO | RT/min | m/z       | m/z in SPECTRUM         |                     | RT of CHROMATOGRAM      |                     | PA of CHROMATOGRAM      |                     |
|------------------|----|--------|-----------|-------------------------|---------------------|-------------------------|---------------------|-------------------------|---------------------|
|                  |    |        |           | Repeatability<br>(RSD%) | Precision<br>(RSD%) | Repeatability<br>(RSD%) | Precision<br>(RSD%) | Repeatability<br>(RSD%) | Precision<br>(RSD%) |
| ESI <sup>+</sup> | 1  | 12.76  | 274.2747  | 0.0006                  | 0.0008              | 0.0000                  | 0.0000              | 0.1575                  | 0.2530              |
|                  | 2  | 27.24  | 338.3433  | 0.0007                  | 0.0019              | 0.0000                  | 0.0000              | 0.5671                  | 0.7452              |
|                  | 3  | 27.01  | 413.2671  | 0.0008                  | 0.0012              | 0.0000                  | 0.0000              | 0.7963                  | 0.8931              |
|                  | 4  | 17.50  | 496.3404  | 0.0005                  | 0.0013              | 1.4358                  | 0.0000              | 0.1079                  | 1.0480              |
|                  | 5  | 17.84  | 546.3561  | 0.0007                  | 0.0015              | 0.0000                  | 0.0000              | 0.1458                  | 1.0021              |
|                  | 6  | 6.39   | 697.9091  | 0.0007                  | 0.0009              | 2.4378                  | 0.2033              | 2.4668                  | 0.4056              |
|                  | 7  | 26.99  | 803.5423  | 0.0010                  | 0.0004              | 0.3564                  | 0.3801              | 2.7654                  | 1.1395              |
|                  | 8  | 7.00   | 872.8603  | 0.0021                  | 0.0000              | 0.5601                  | 0.4385              | 1.1267                  | 1.2263              |
|                  | 9  | 17.97  | 991.6704  | 0.0009                  | 0.0021              | 1.1195                  | 0.0410              | 0.1724                  | 0.8215              |
|                  | 10 | 17.00  | 1039.6715 | 0.0007                  | 0.0003              | 0.0000                  | 0.0021              | 0.2348                  | 0.4357              |
| ESI <sup>-</sup> | 1  | 17.98  | 255.4359  | 0.0031                  | 0.0012              | 0.0000                  | 0.0000              | 0.9879                  | 1.2931              |
|                  | 2  | 23.18  | 279.4293  | 0.0027                  | 0.0011              | 0.0000                  | 0.0031              | 0.1632                  | 0.4155              |
|                  | 3  | 10.79  | 369.3278  | 0.0031                  | 0.0004              | 0.0000                  | 0.0000              | 0.1608                  | 0.2078              |
|                  | 4  | 12.80  | 448.4175  | 0.0021                  | 0.0019              | 0.0000                  | 0.6581              | 0.0495                  | 0.9550              |
|                  | 5  | 17.01  | 504.3253  | 0.0018                  | 0.0000              | 1.0472                  | 0.0504              | 0.1814                  | 0.2165              |
|                  | 6  | 26.98  | 593.4810  | 0.0035                  | 0.0010              | 0.2514                  | 0.4162              | 2.6998                  | 1.7362              |
|                  | 7  | 28.32  | 719.4469  | 0.0029                  | 0.0024              | 0.4952                  | 0.0000              | 3.4915                  | 2.4671              |
|                  | 8  | 27.36  | 826.3910  | 0.0029                  | 0.0002              | 1.1704                  | 0.0000              | 2.1372                  | 2.6638              |
|                  | 9  | 6.03   | 993.2782  | 0.0026                  | 0.0014              | 1.9851                  | 0.0042              | 1.3664                  | 1.4521              |
|                  | 10 | 18.01  | 1035.2944 | 0.0032                  | 0.0009              | 1.5668                  | 0.0000              | 1.0324                  | 2.4119              |

m/z, mass to charge ratio, Th; RT, retention time, min; PA, peak area. Precision is intermediate precision, RSD, Relative standard deviation.

**Table S2** Metabolic pathways perturbed results from MetaboAnalyst 4.0.

| <b>Pathways</b>                | <b>Total</b> | <b>Expected</b> | <b>Hits</b> | <b>Raw p</b> | <b>LOG(p)</b> | <b>FDR</b> | <b>Impact</b> |
|--------------------------------|--------------|-----------------|-------------|--------------|---------------|------------|---------------|
| Glycerophospholipid metabolism | 39           | 0.34026         | 5           | 1.45E-05     | 11.145        | 0.001133   | 0.2782        |
| Retinol metabolism             | 22           | 0.19194         | 4           | 2.83E-05     | 10.472        | 0.001133   | 0.25141       |
| Ether lipid metabolism         | 23           | 0.20066         | 3           | 0.000907     | 7.0057        | 0.023286   | 0.07375       |
| Sphingolipid metabolism        | 25           | 0.21811         | 3           | 0.001164     | 6.7556        | 0.023286   | 0.1402        |
| Galactose metabolism           | 41           | 0.35771         | 3           | 0.004932     | 5.312         | 0.078913   | 0.03353       |
| Starch and sucrose metabolism  | 50           | 0.43623         | 2           | 0.069103     | 2.6721        | 0.92138    | 0.01344       |
| Arachidonic acid metabolism    | 62           | 0.54092         | 2           | 0.10026      | 2.3           | 1          | 0.21669       |
| Glycolysis or Gluconeogenesis  | 14           | 0.12214         | 1           | 0.11575      | 2.1563        | 1          | 0.0439        |
| Linoleic acid metabolism       | 15           | 0.13087         | 1           | 0.12351      | 2.0914        | 1          | 0             |
| Inositol phosphate metabolism  | 39           | 0.34026         | 1           | 0.29142      | 1.233         | 1          | 0.13703       |

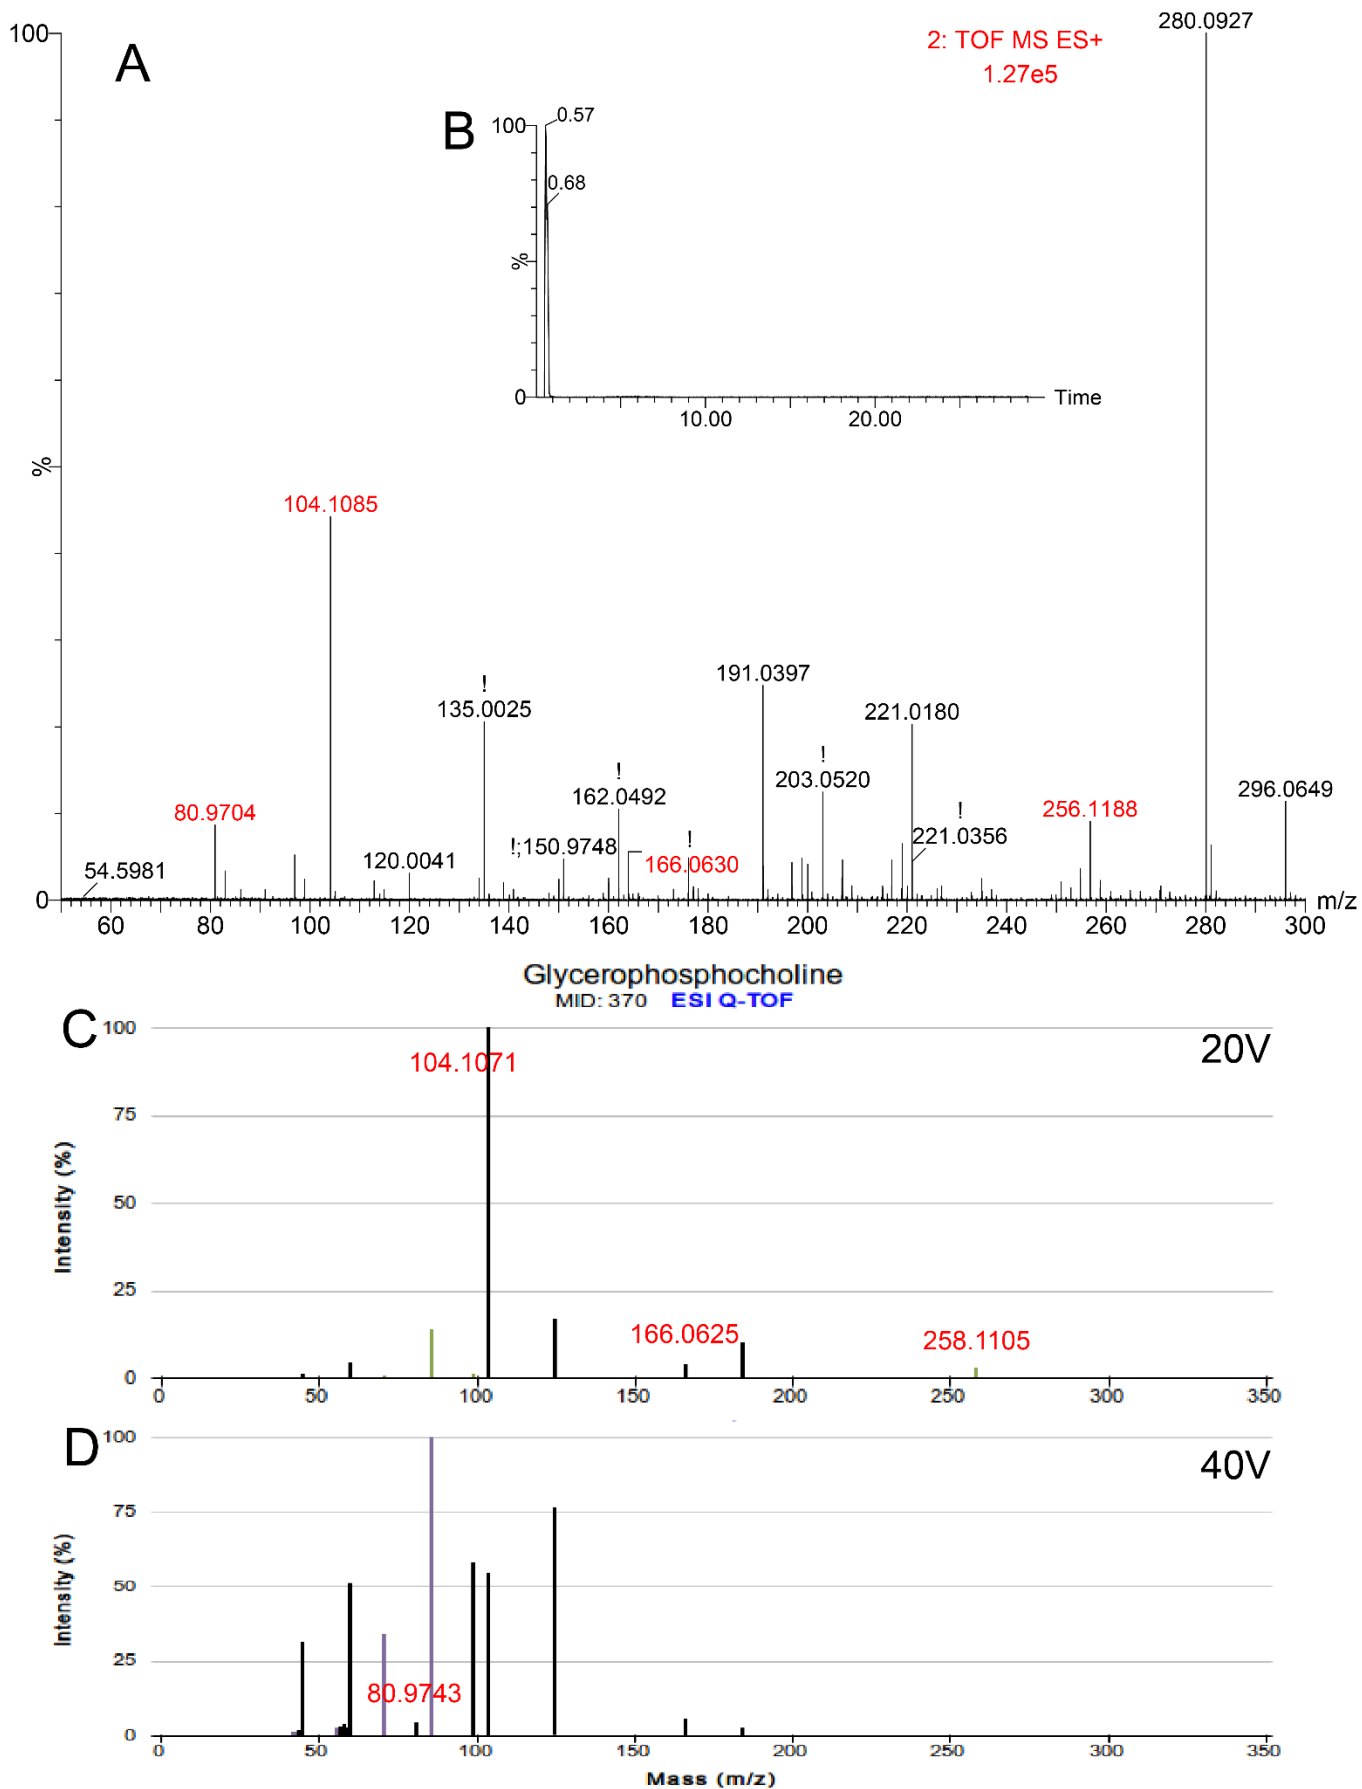

**Figure S1** MS/MS spectra of the identified potential marker Glycerophosphocholine (A) and the chromatographic peak of Glycerophosphocholine (B). The reference spectra from METLIN database with different voltage 20V (C) and 40V (D).

2: TOF MS ES+  
2.64e4

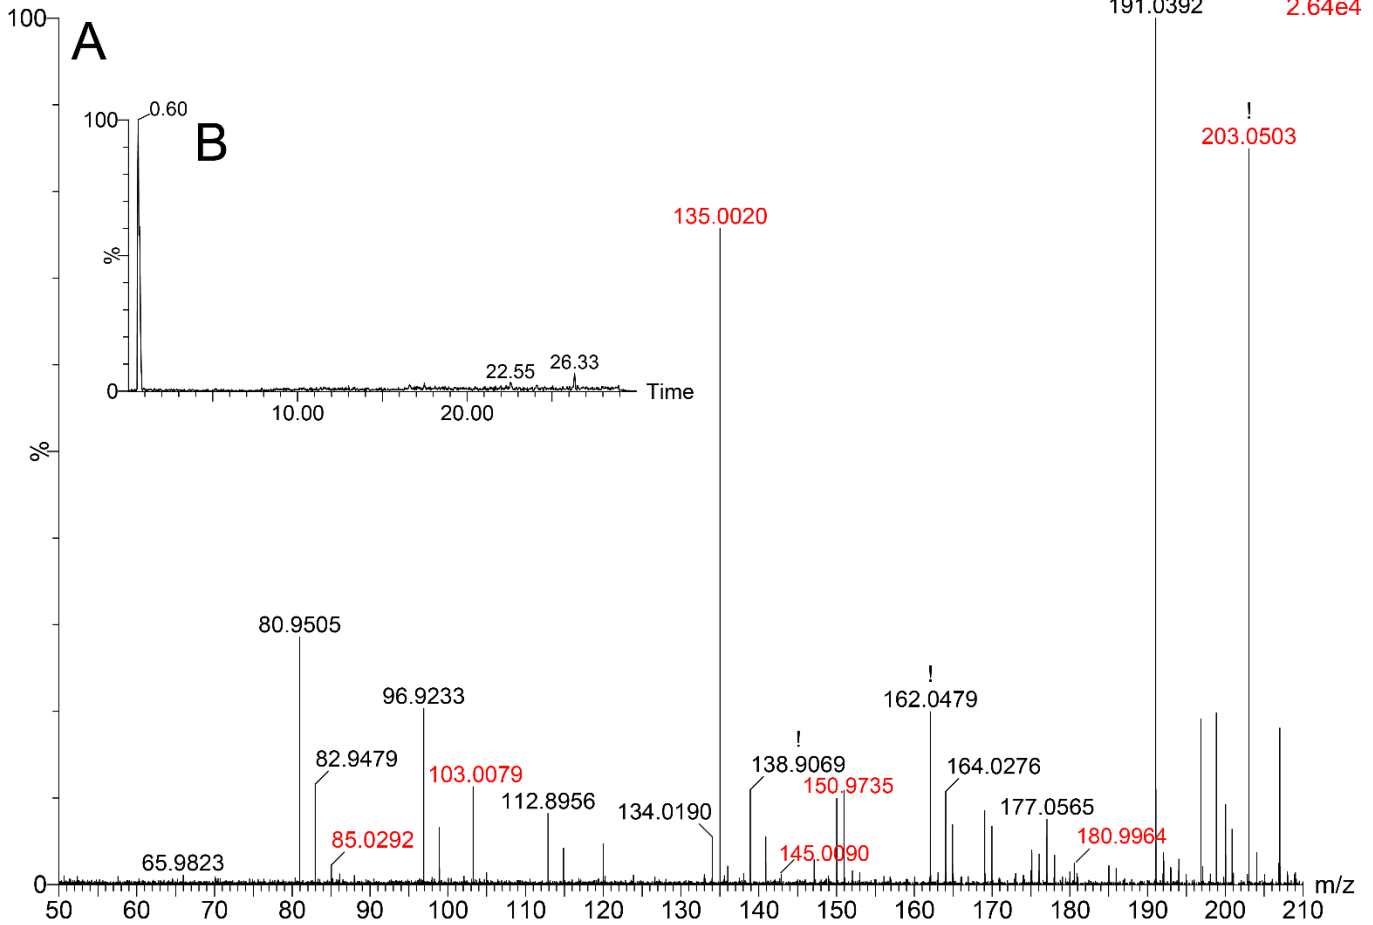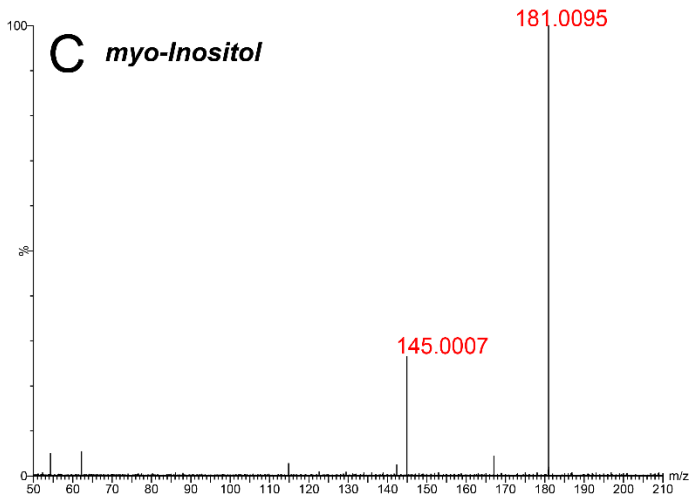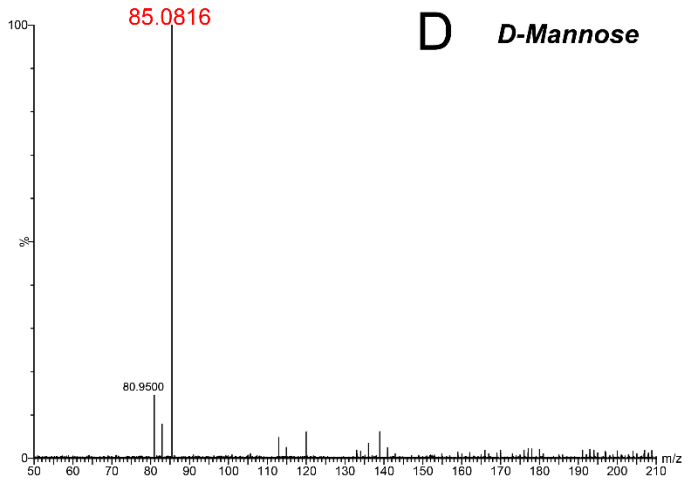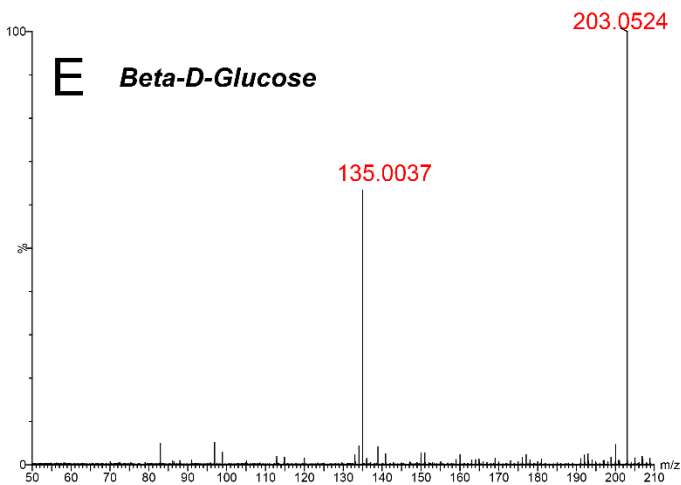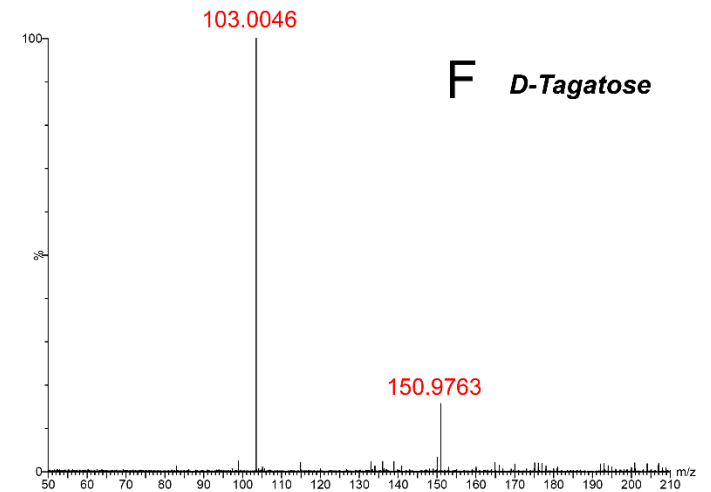

**Figure S2** MS/MS spectra of the identified potential marker Monosaccharides (A) and the chromatographic peak of Glycerophosphocholine (B). The reference standard chemical spectra including Myoinositol (C), D-mannose (D), Beta-d-glucose (E) and D-tagatose (F) in experimental condition.

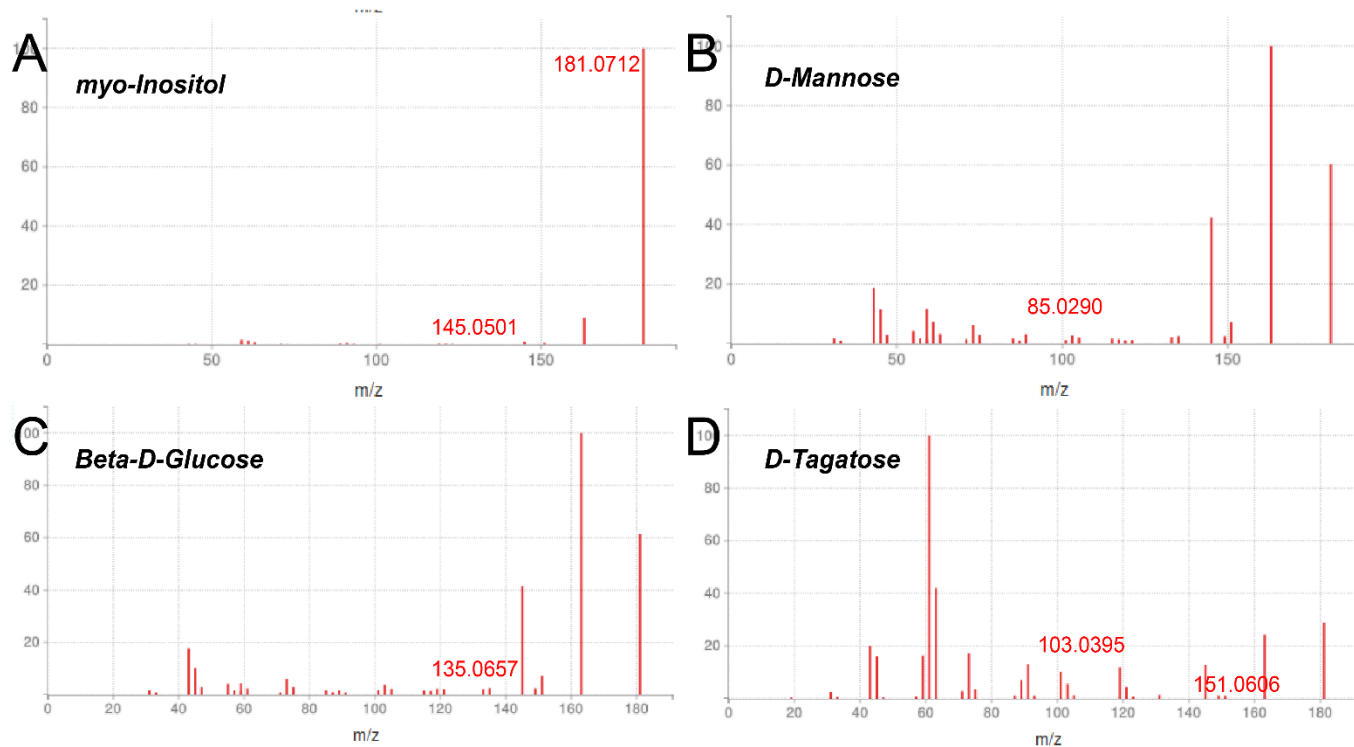

**Figure S2-2** MS/MS spectra of the reference spectra from HMDB database including Myoinositol (A), D-mannose (B), Beta-d-glucose (C) and D-tagatose (D).

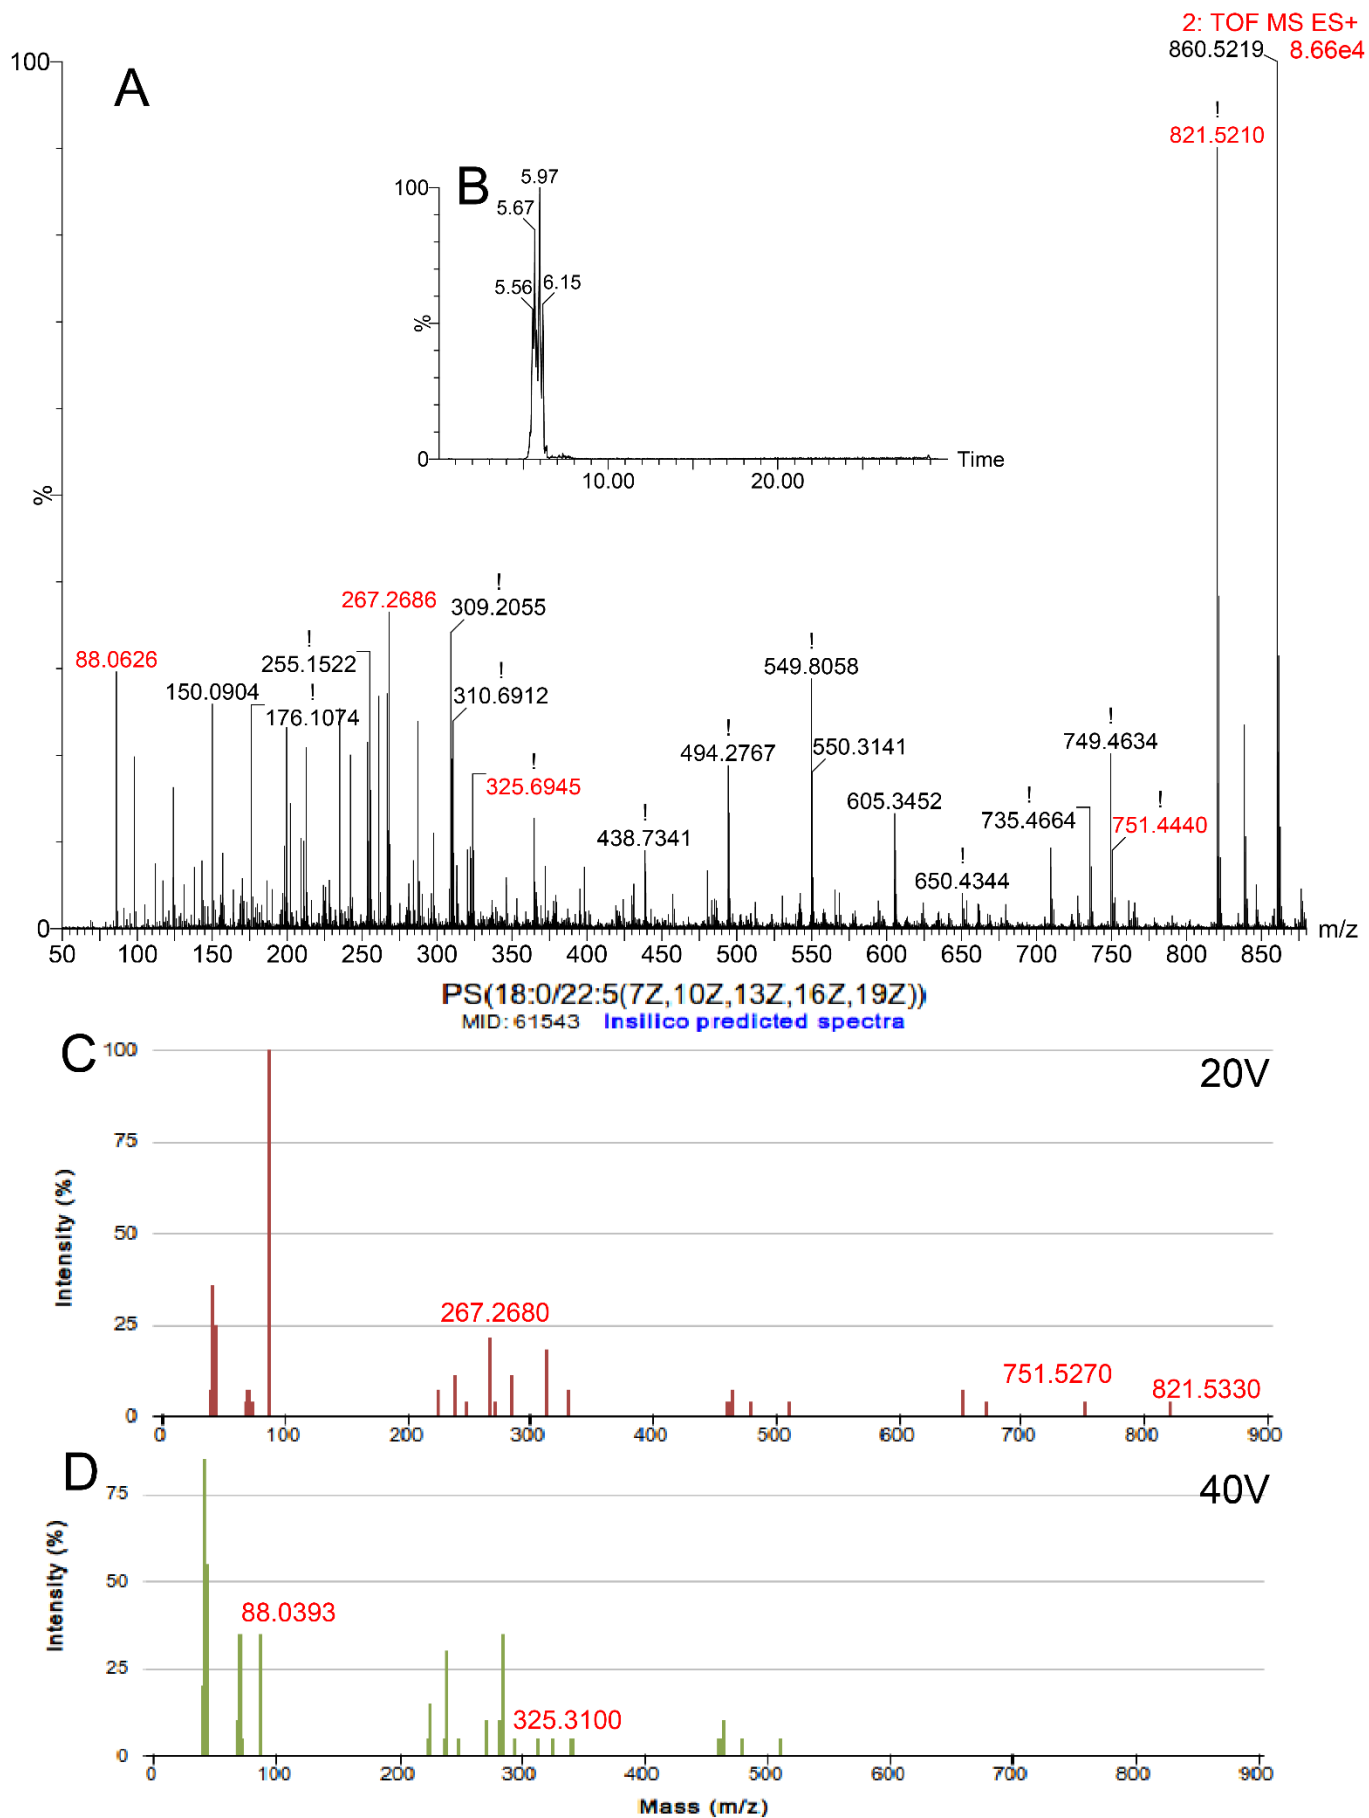

**Figure S3** MS/MS spectra of the identified potential marker PS(18:0/22:5) (A) and the chromatographic peak of PS(18:0/22:5) (B). The reference spectra from METLIN database with different voltage 20V (C) and 40V (D).

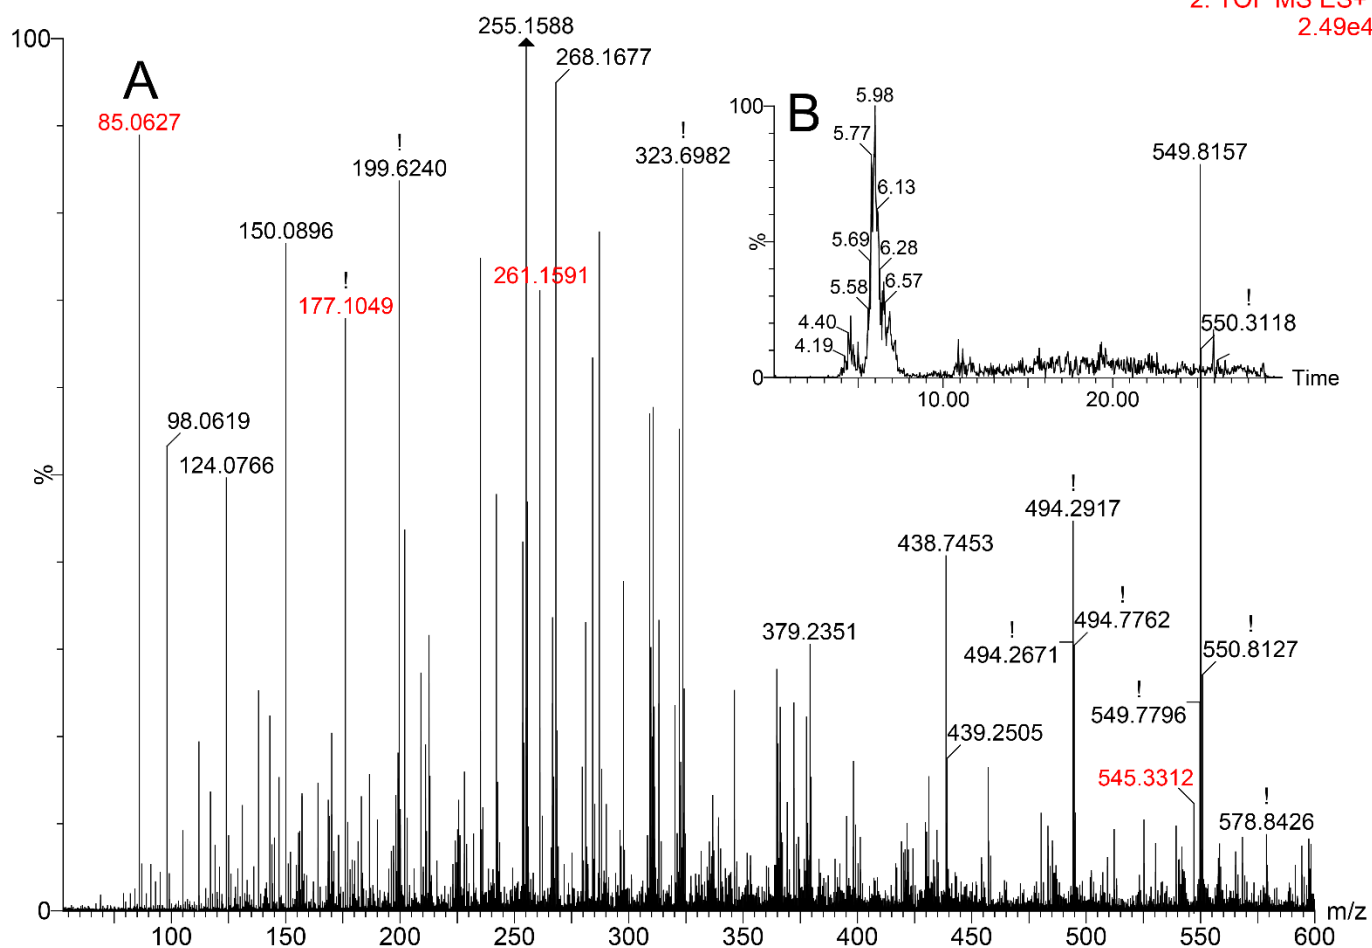

**Cholesterol glucuronide**  
MID: 57961 **Insilico predicted spectra**

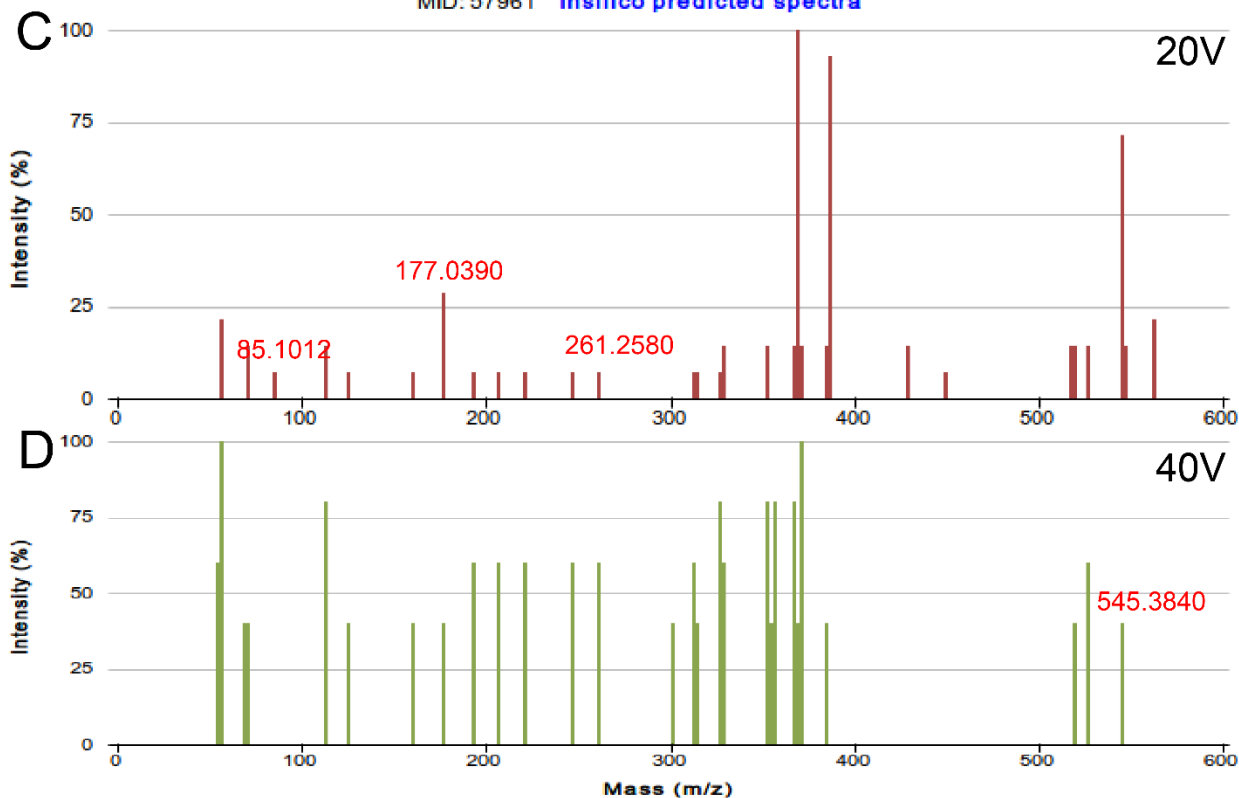

**Figure S4** MS/MS spectra of the identified potential marker Cholesterol glucuronide (A) and the chromatographic peak of Cholesterol glucuronide (B). The reference spectra from METLIN database with different voltage 20V (C) and 40V (D).

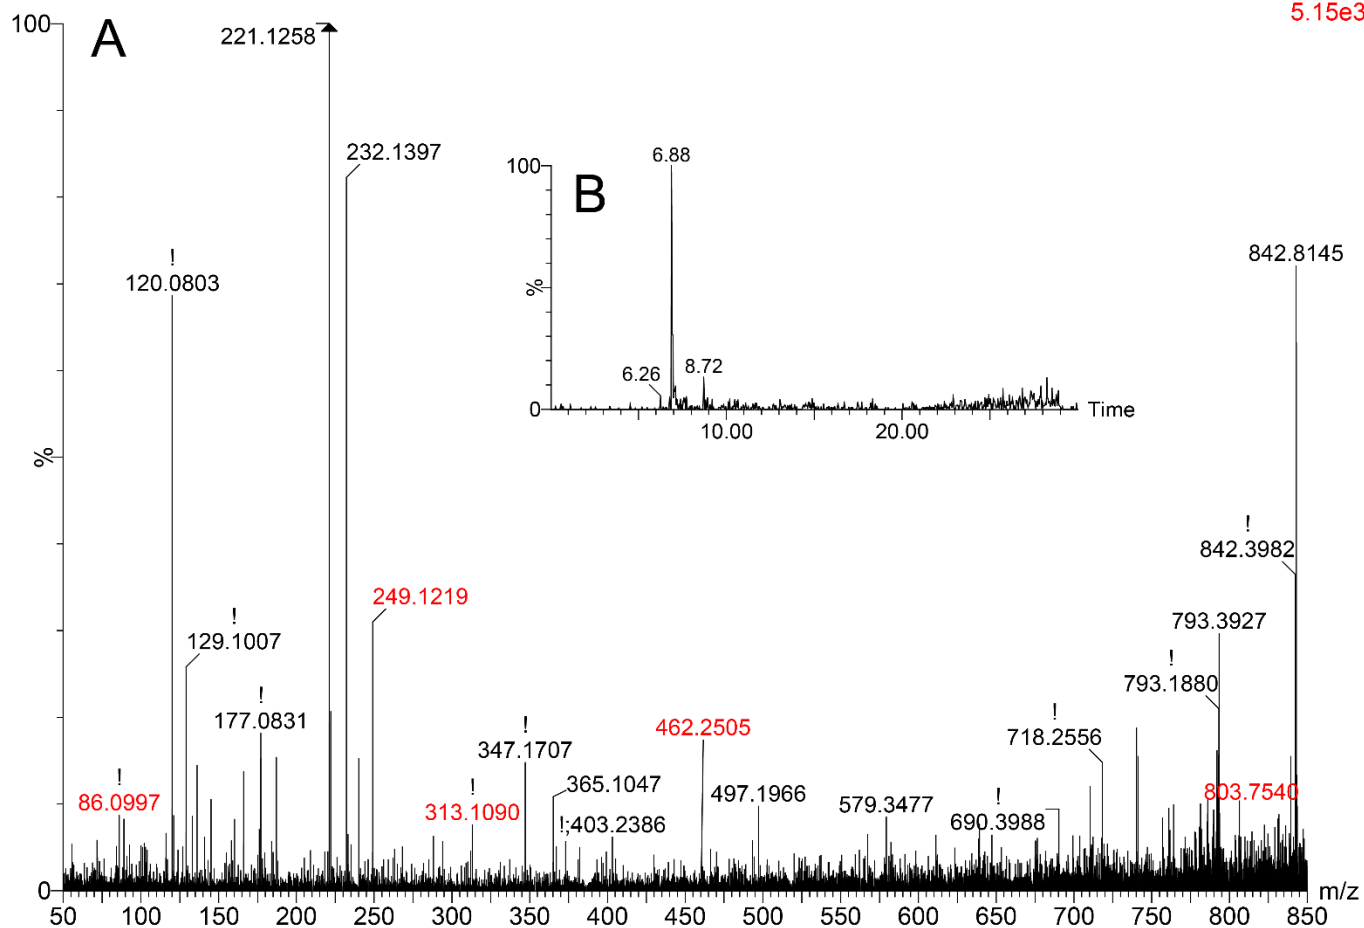

PS(18:0/20:0)

MID: 61541 Insilico predicted spectra

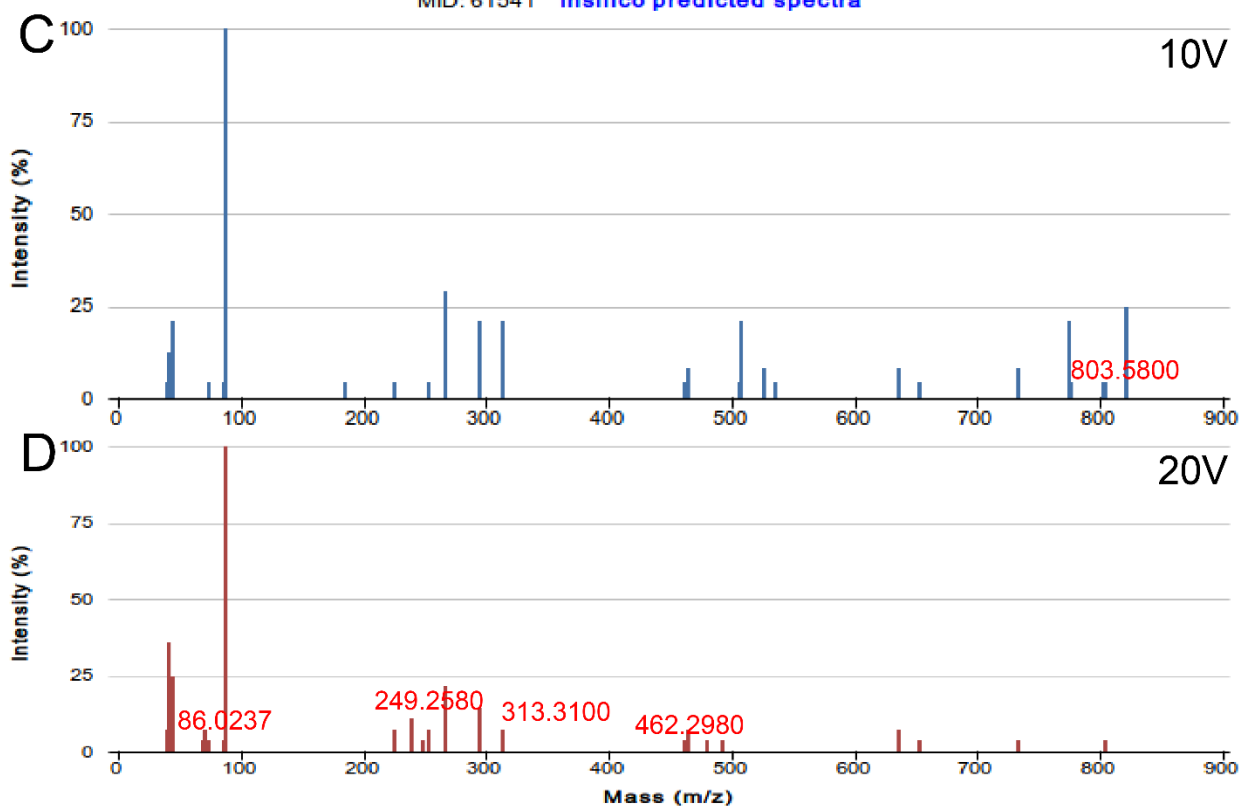

**Figure S5** MS/MS spectra of the identified potential marker PS(18:0/20:0) (A) and the chromatographic peak of PS(18:0/20:0) (B). The reference spectra from METLIN database with different voltage 20V (C) and 40V (D).



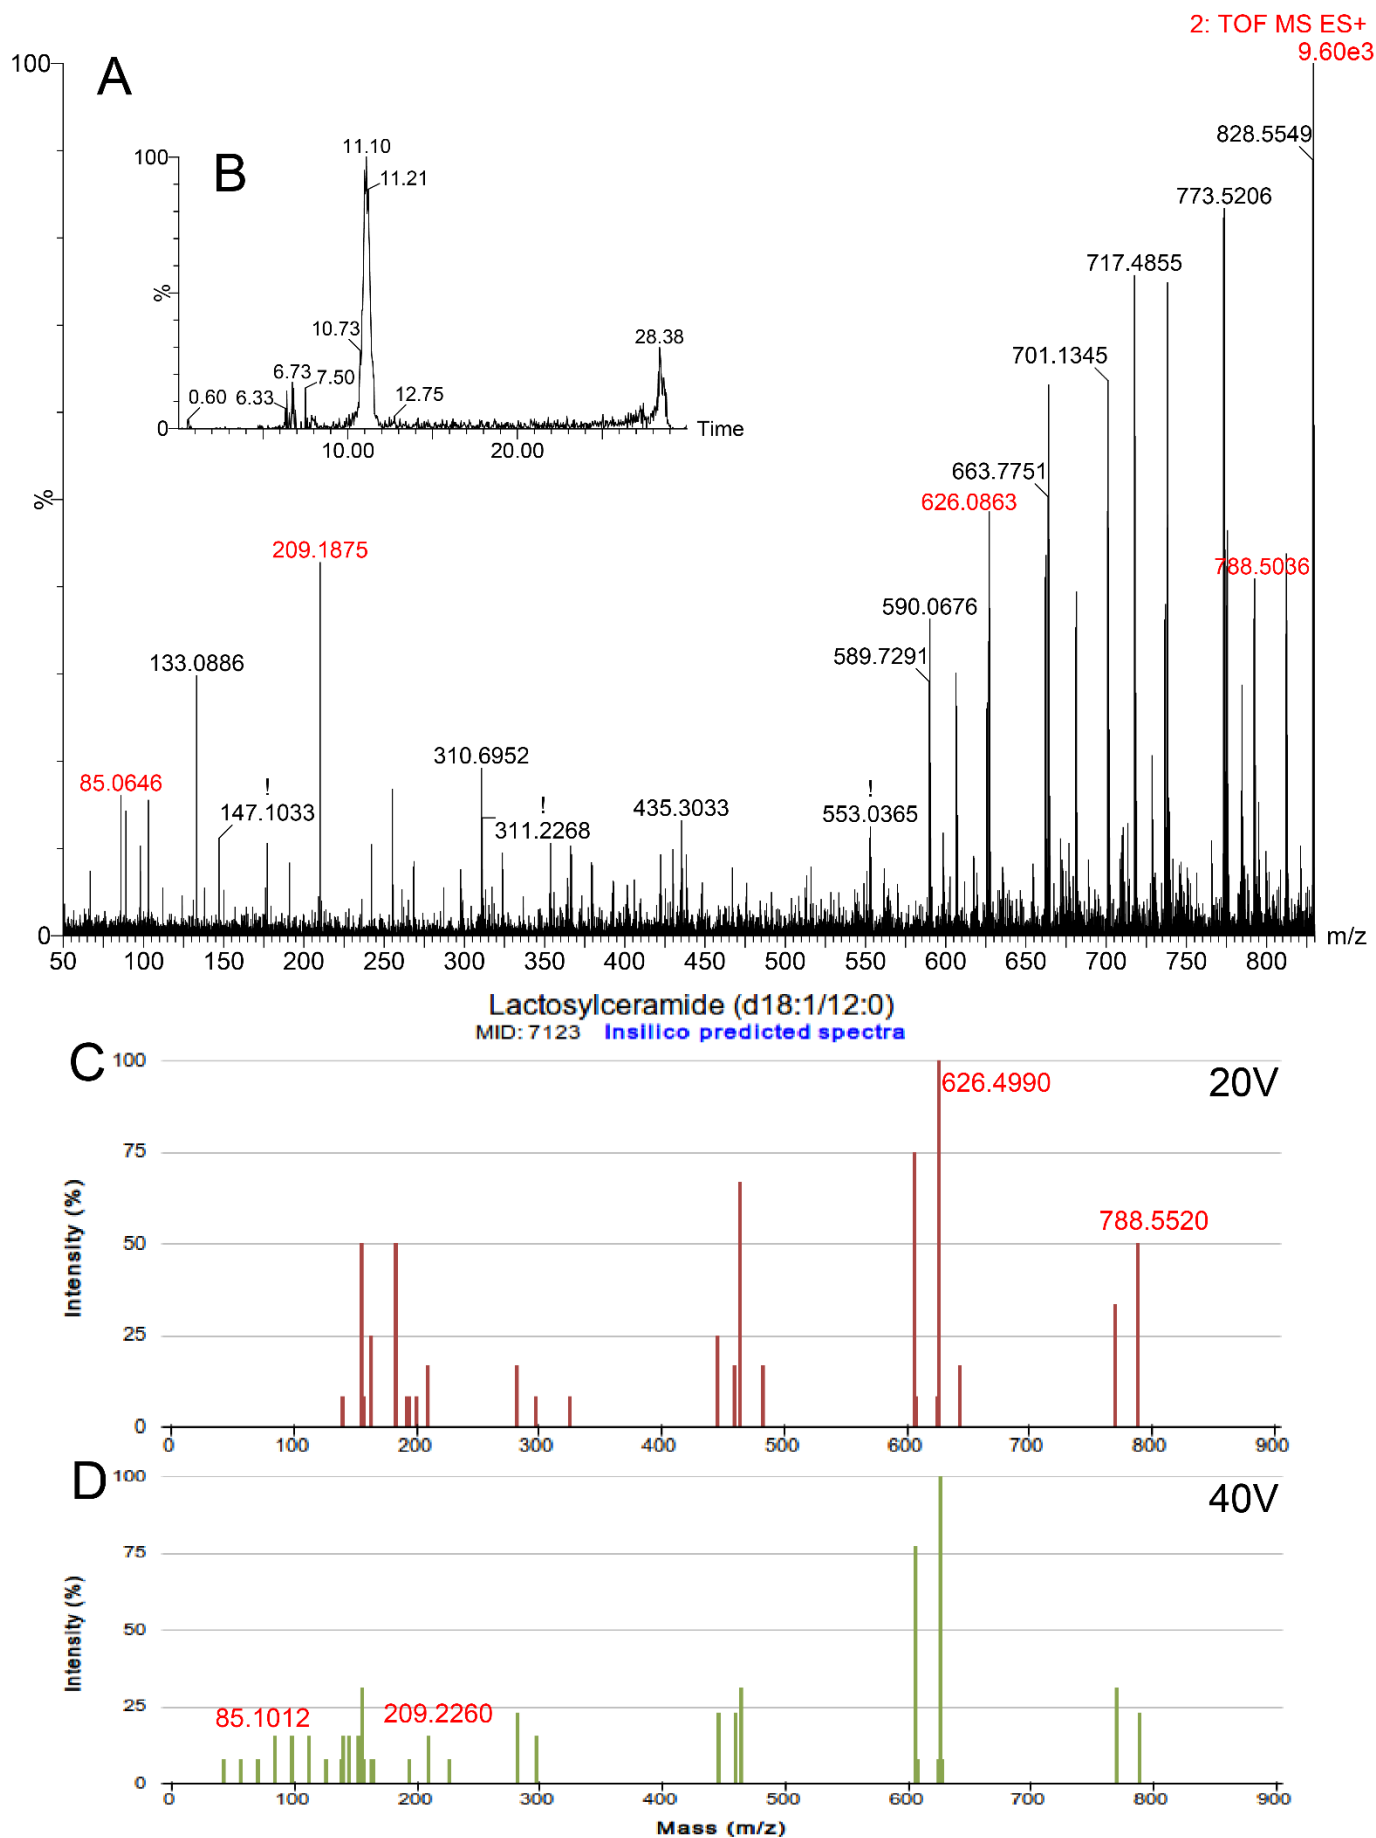

**Figure S6** MS/MS spectra of the identified potential marker Lactosylceramide (d18:1/12:0) (A) and the chromatographic peak of Lactosylceramide (d18:1/12:0) (B). The reference spectra from METLIN database with different voltage 20V (C) and 40V (D).

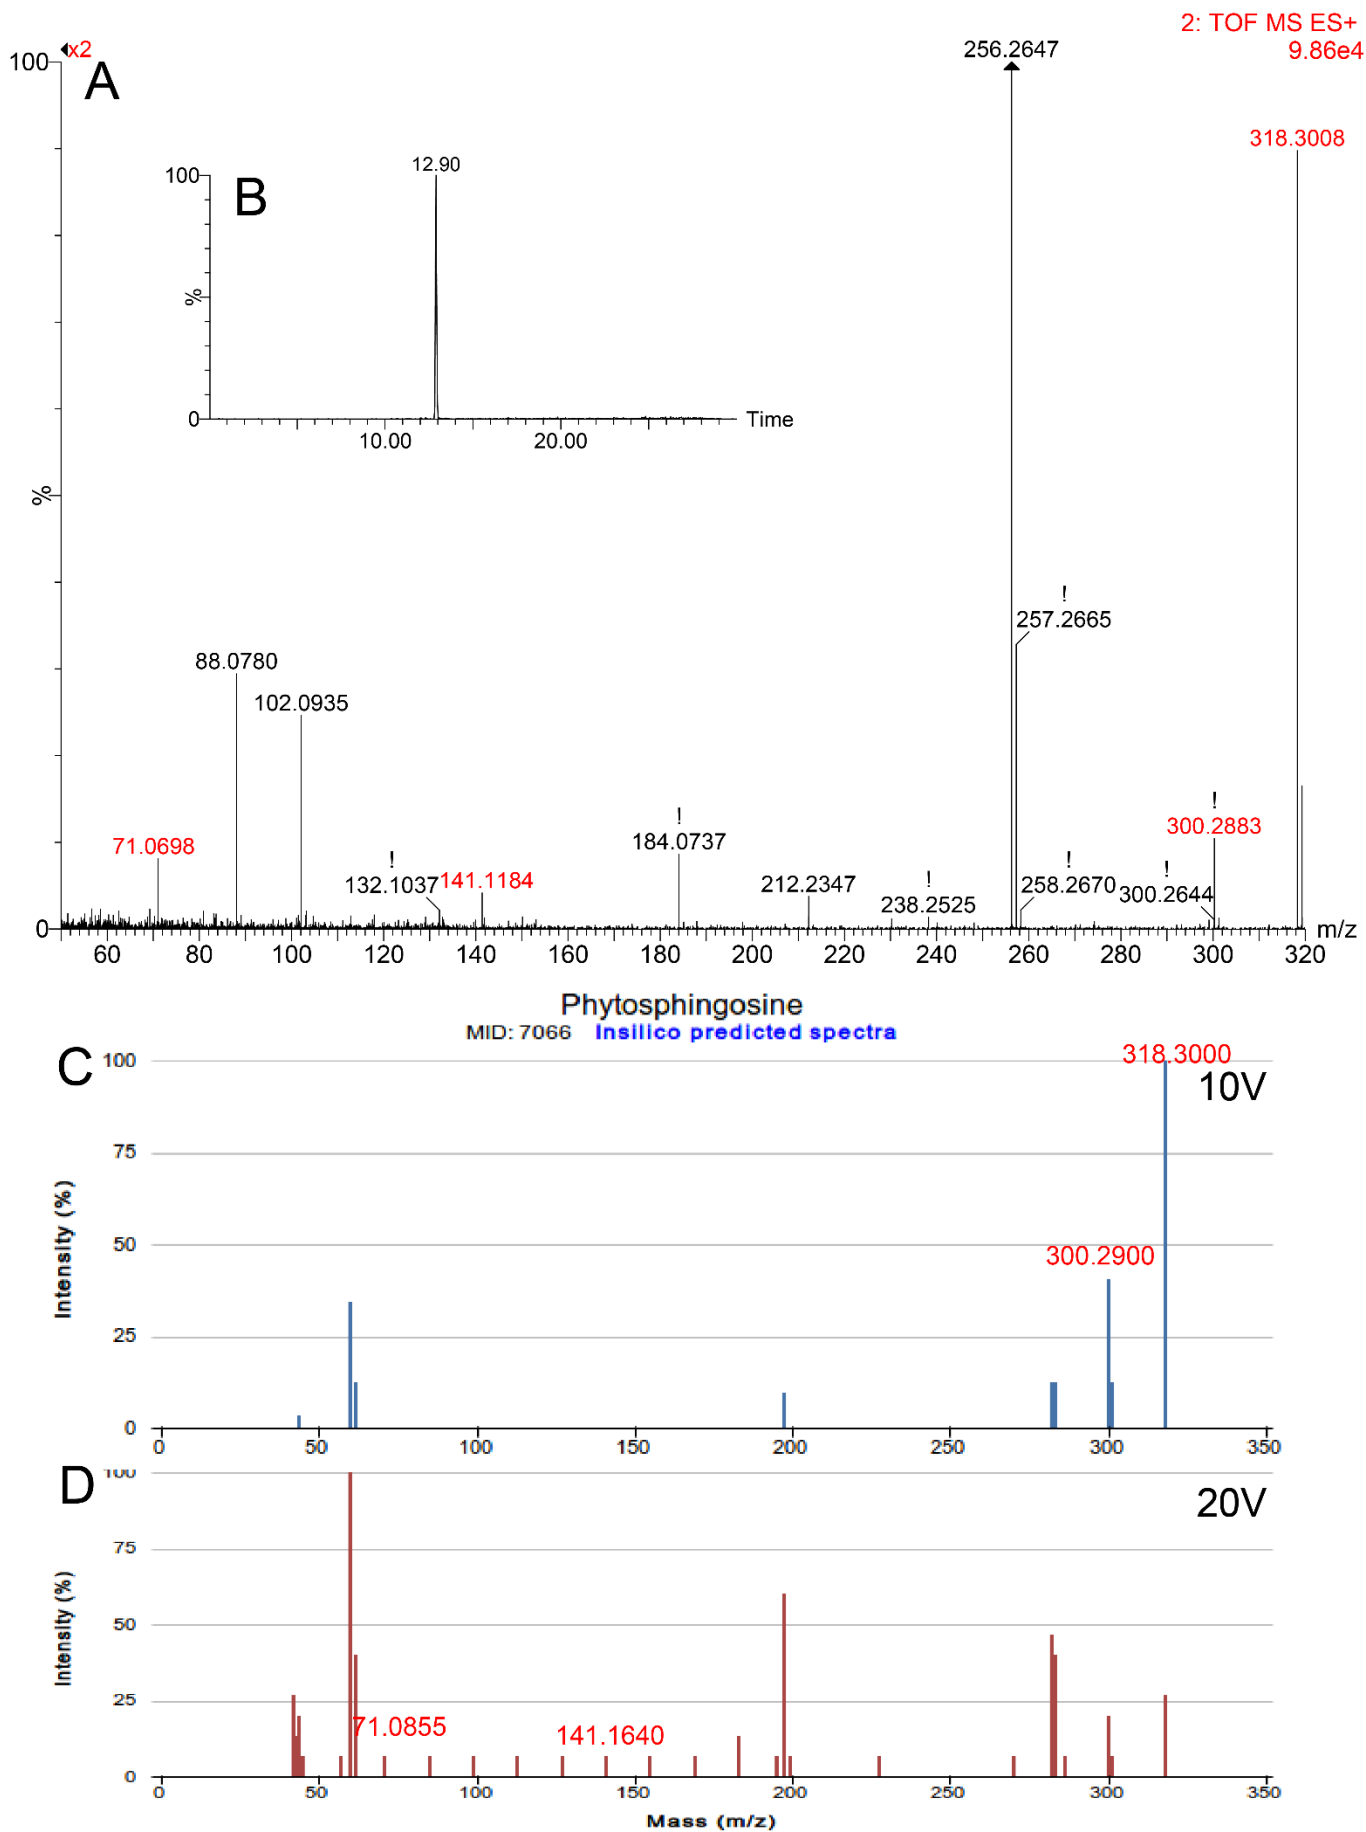

**Figure S7** MS/MS spectra of the identified potential marker Phytosphingosine (A) and the chromatographic peak of Phytosphingosine (B). The reference spectra from METLIN database with different voltage 10V (C) and 20V (D).

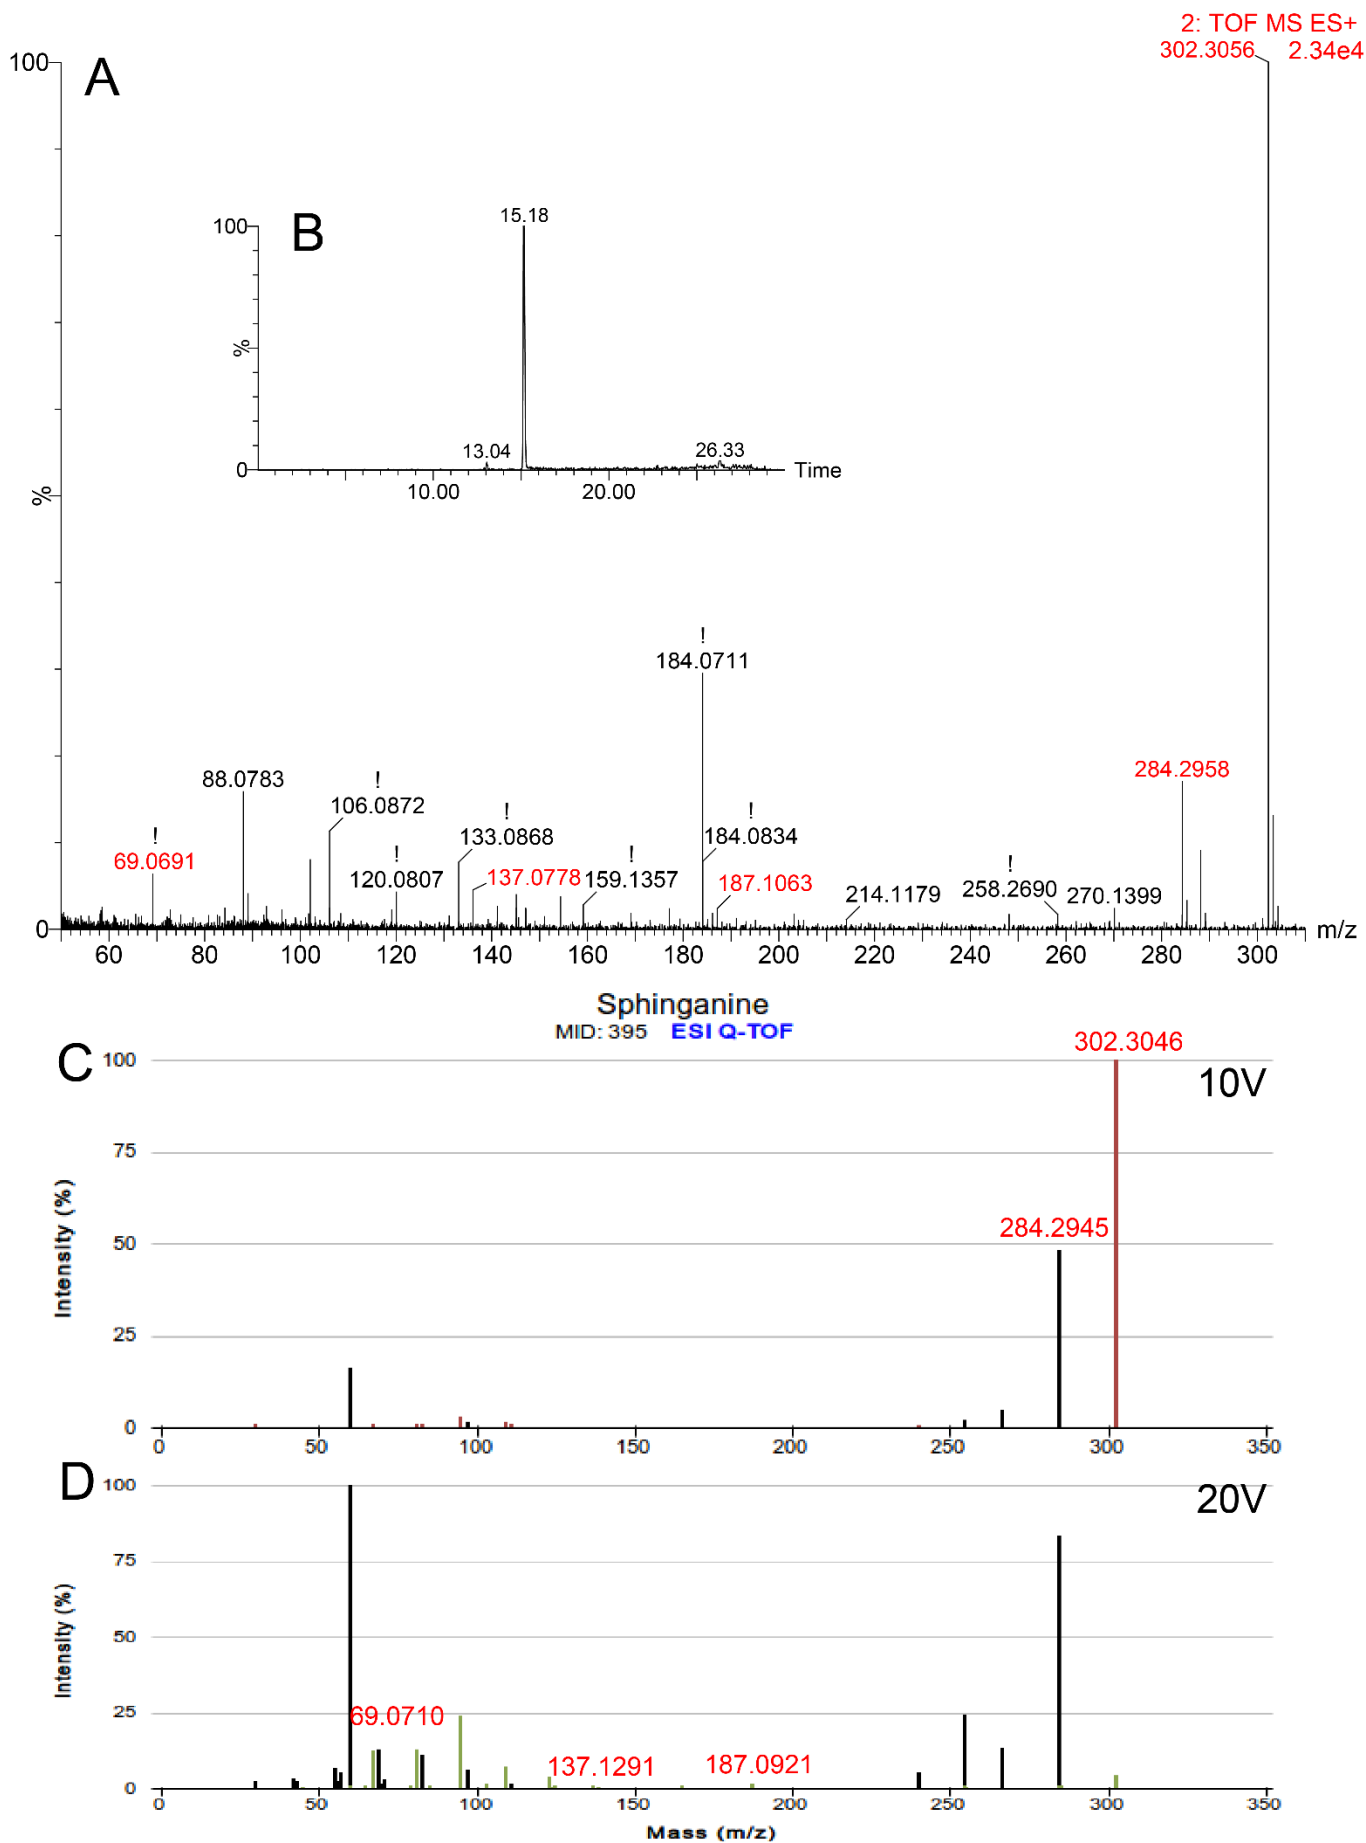

**Figure S8** MS/MS spectra of the identified potential marker Sphinganine (A) and the chromatographic peak of Sphinganine (B). The reference spectra from METLIN database with different voltage 10V (C) and 20V (D).

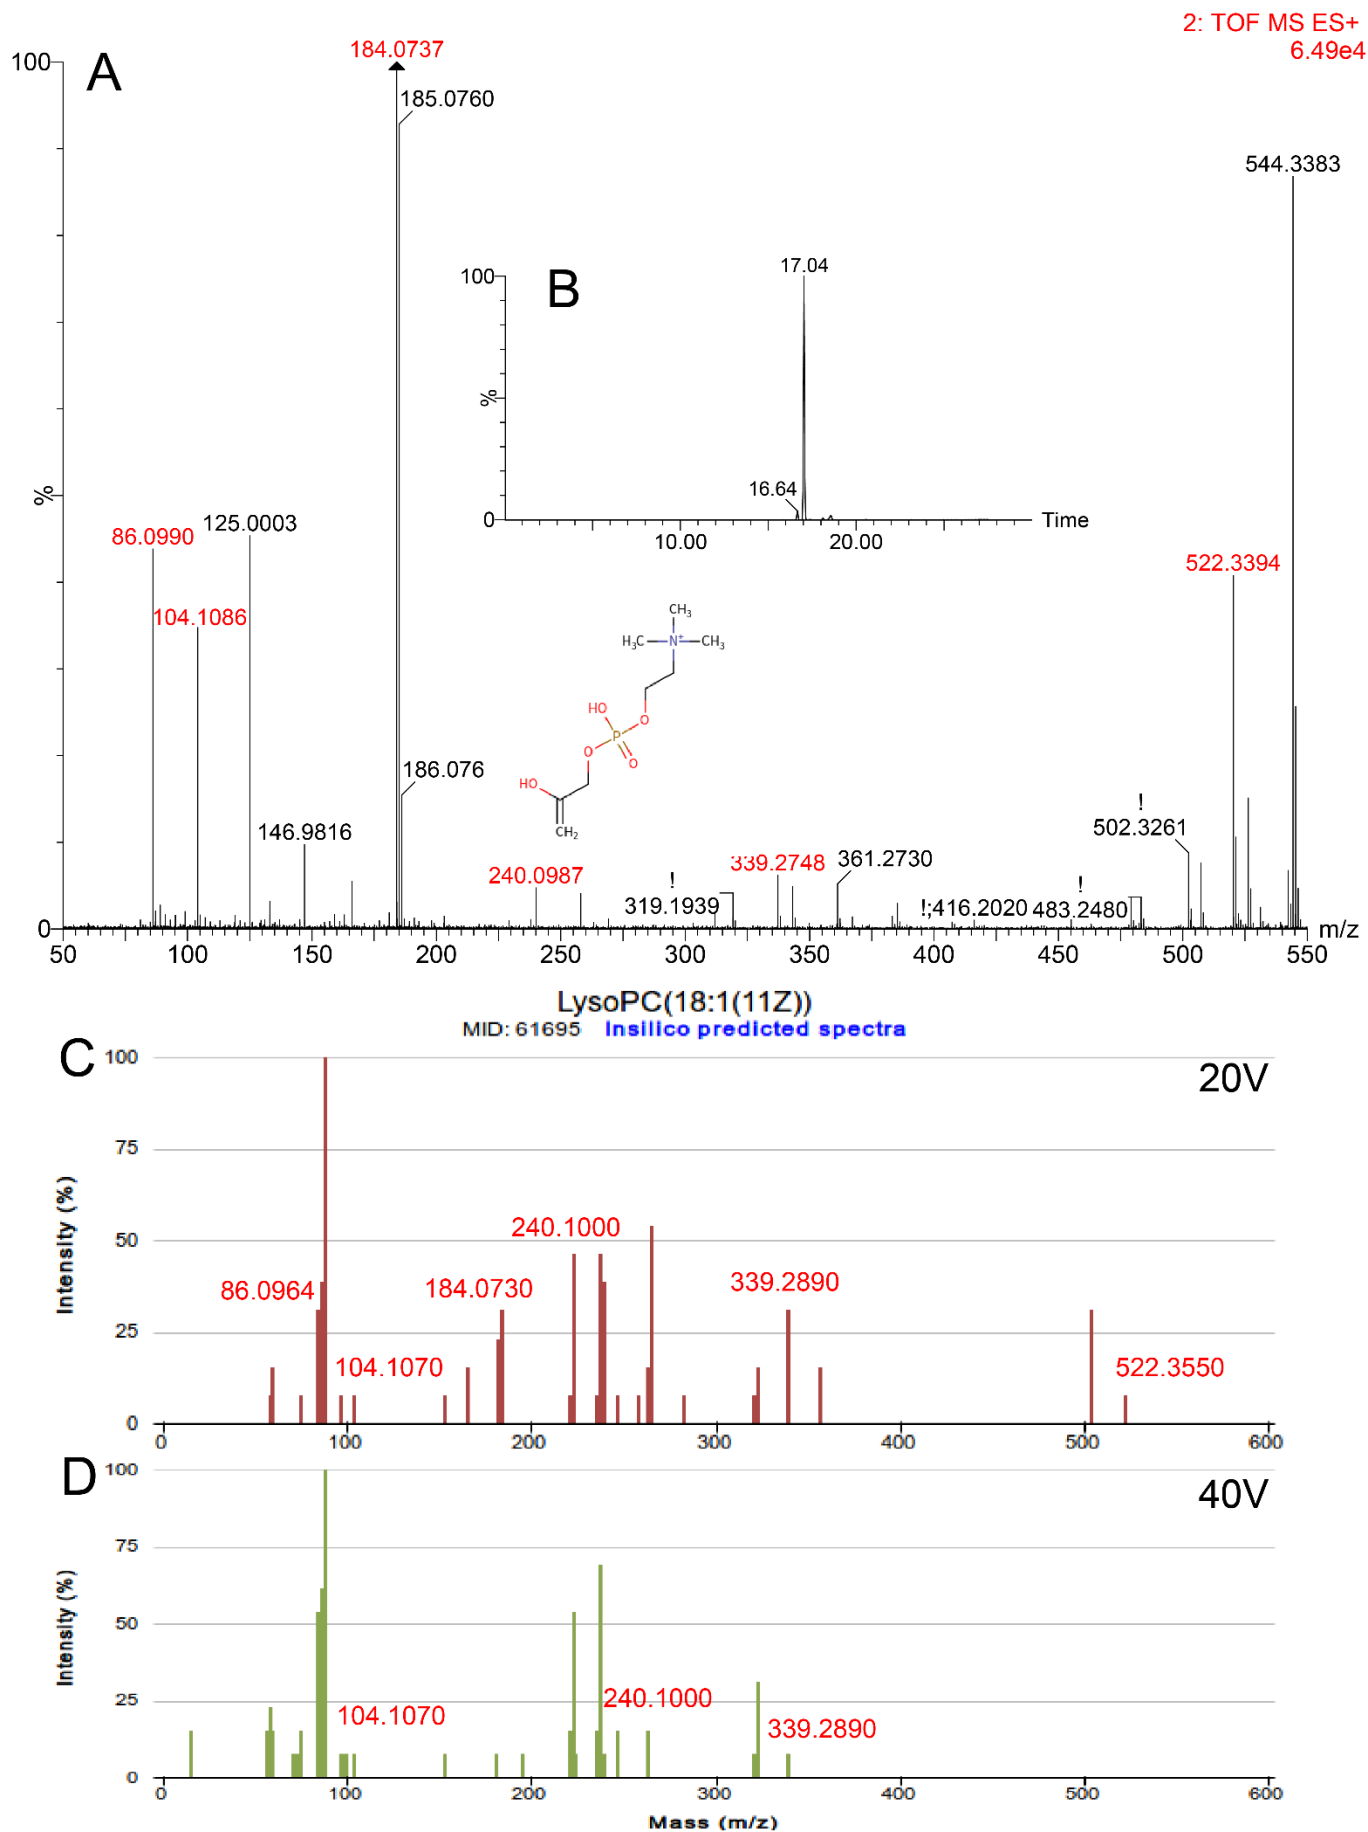

**Figure S9** MS/MS spectra of the identified potential marker LysoPC (18:1) (A) and the chromatographic peak of LysoPC(18:1) (B). The reference spectra from METLIN database with different voltage 20V (C) and 40V (D).

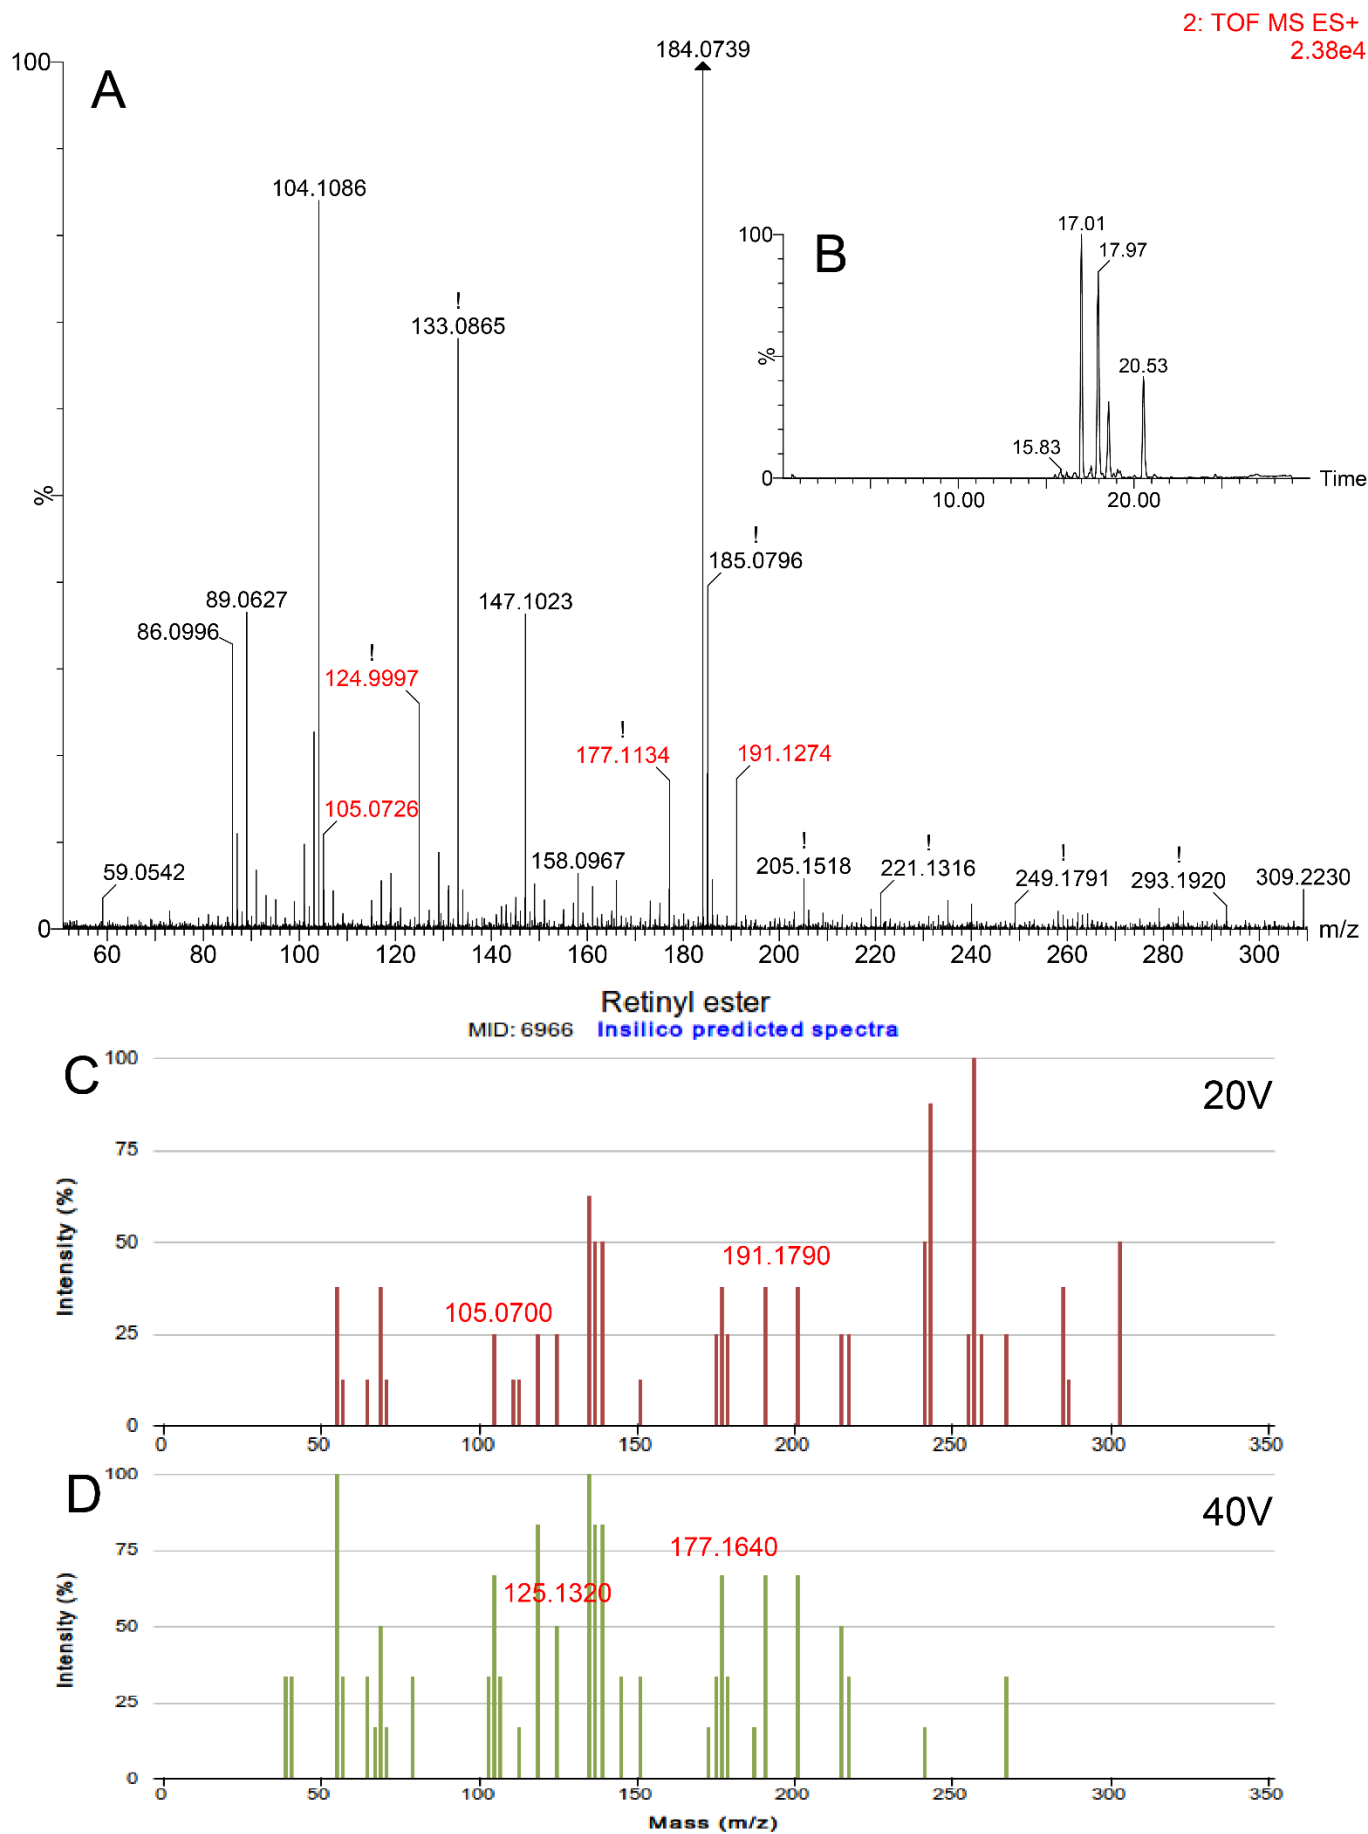

**Figure S10** MS/MS spectra of the identified potential marker Retinyl ester (A) and the chromatographic peak of Retinyl ester (B). The reference spectra from METLIN database with different voltage 20V (C) and 40V (D).

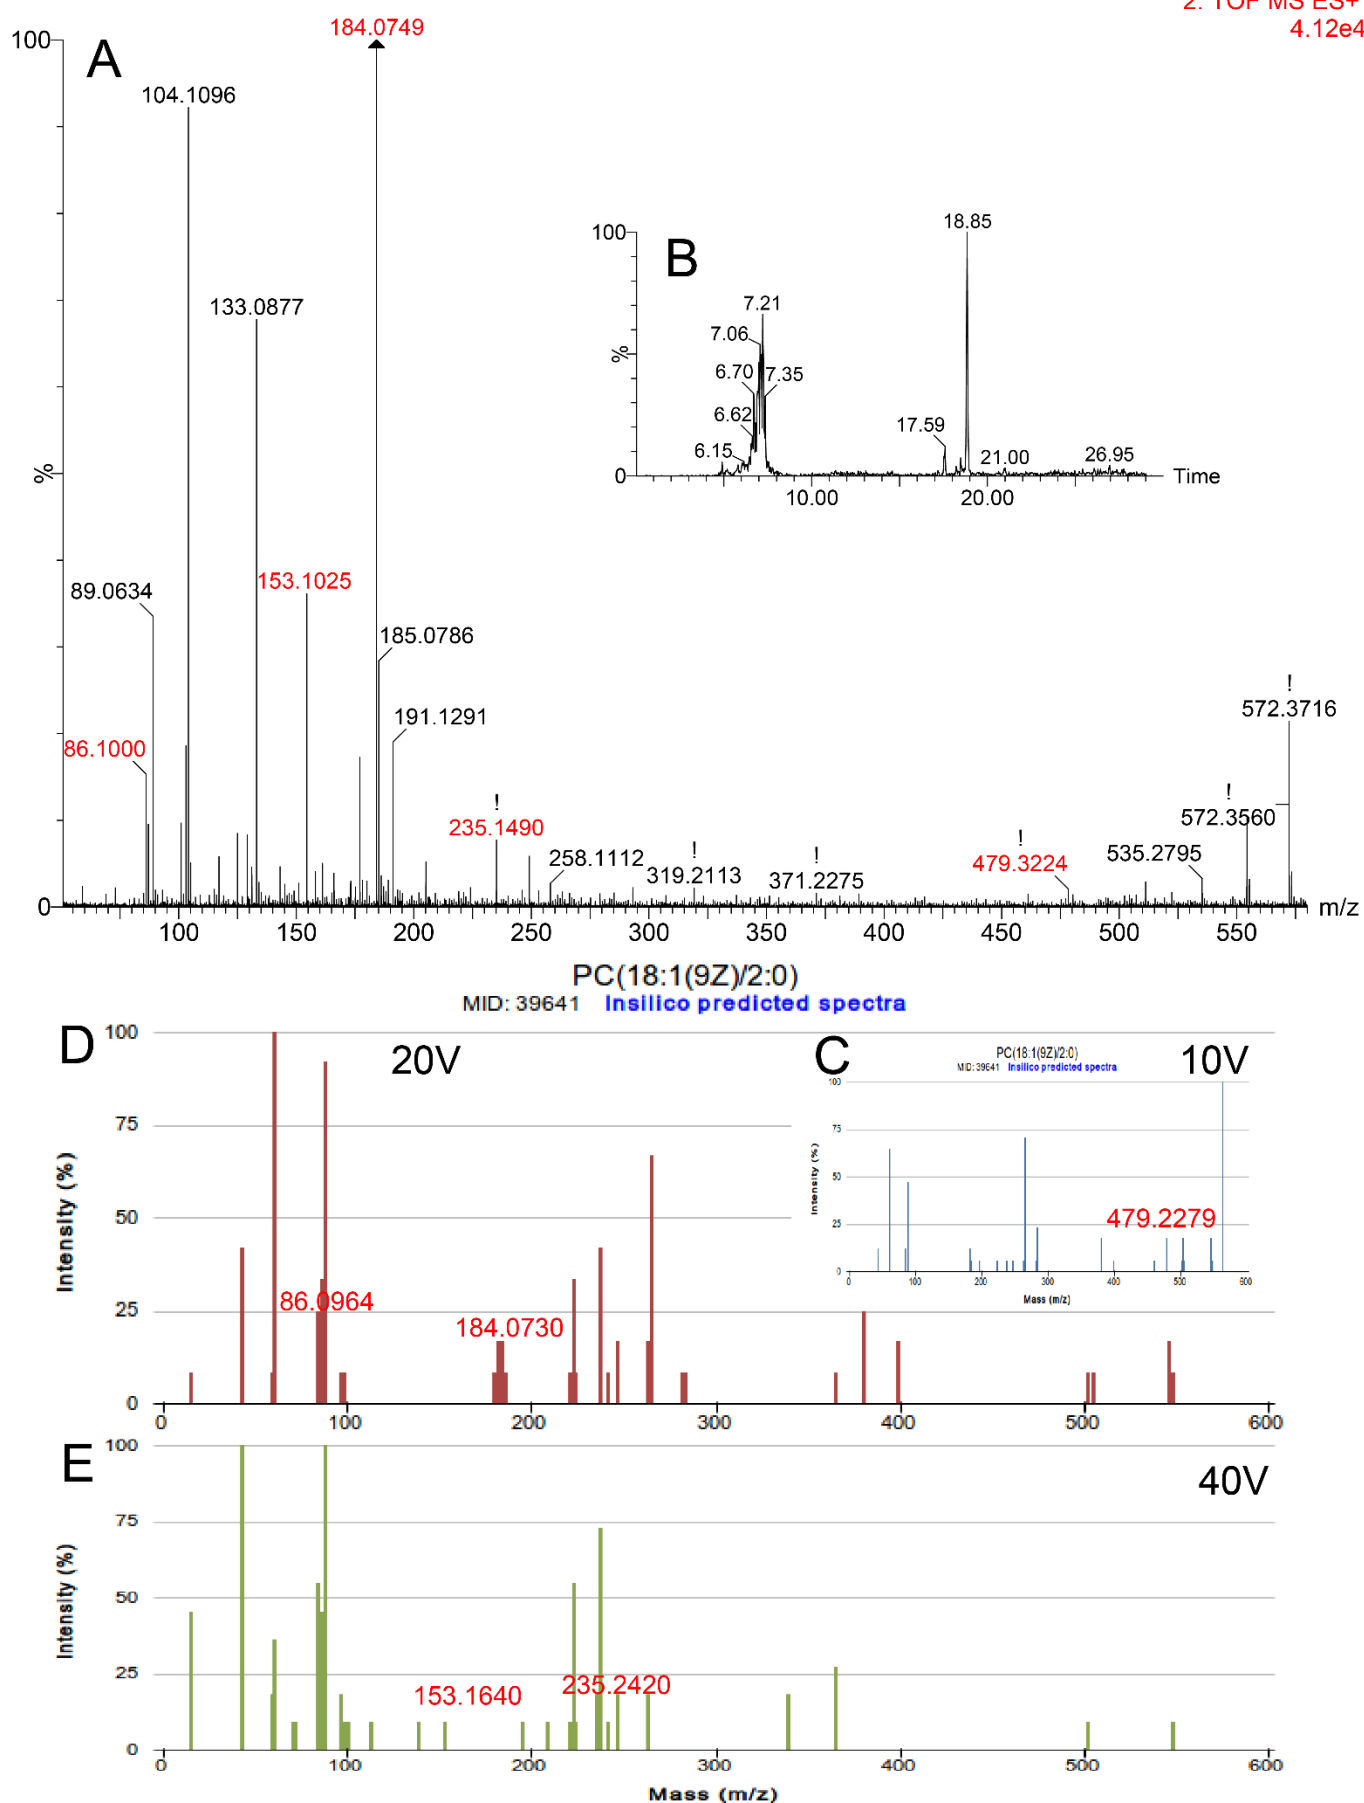

**Figure S11** MS/MS spectra of the identified potential marker PC(18:1/2:0) (A) and the chromatographic peak of PC(18:1/2:0) (B). The reference spectra from METLIN database with different voltage 20V (C) and 40V (D).

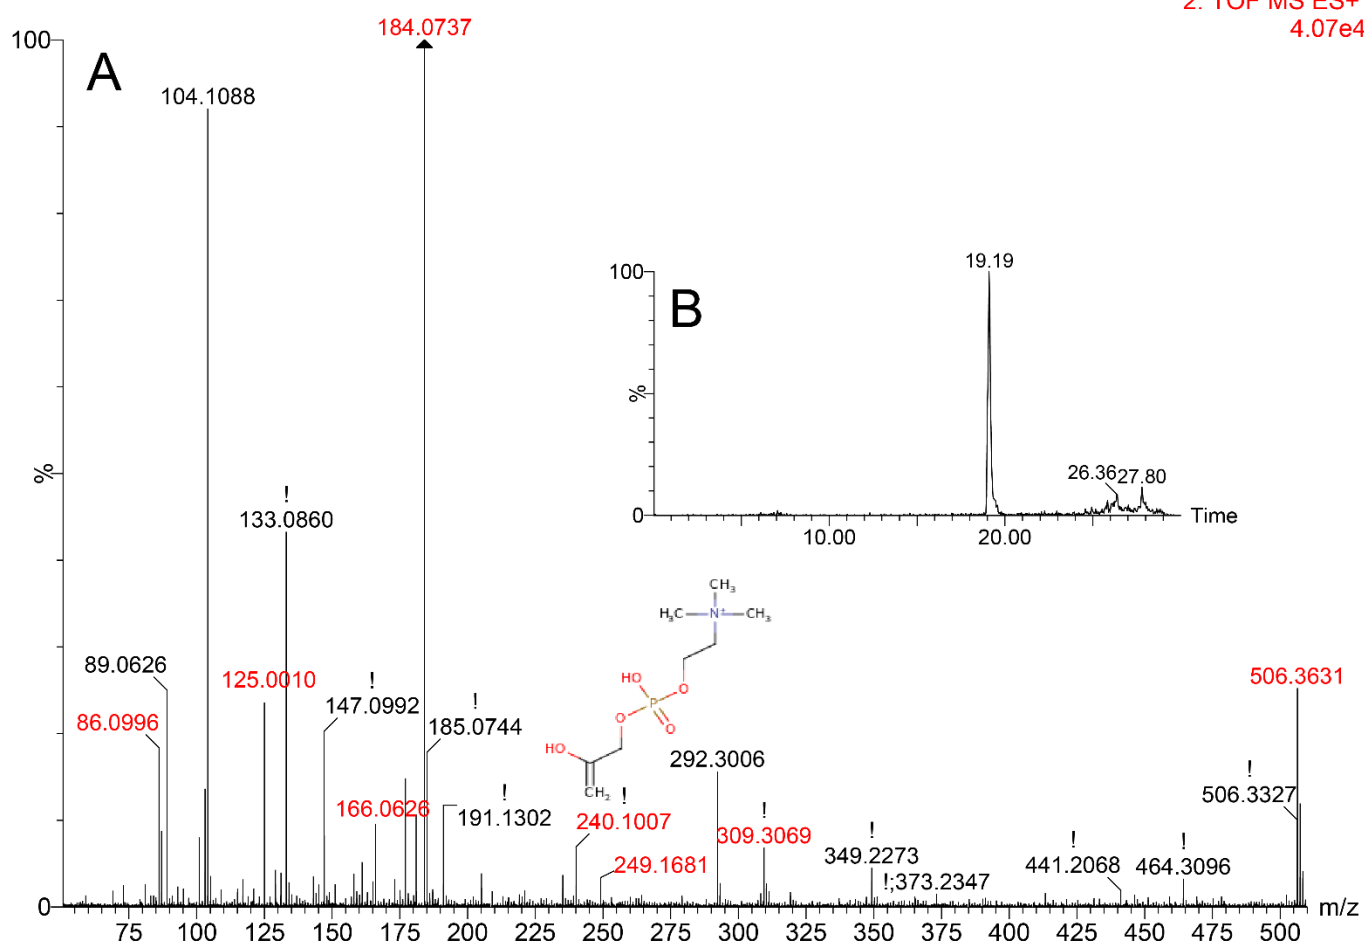

HMDB ID: HMDB0010408  
Compound LysoPC(P-18:1(9Z))

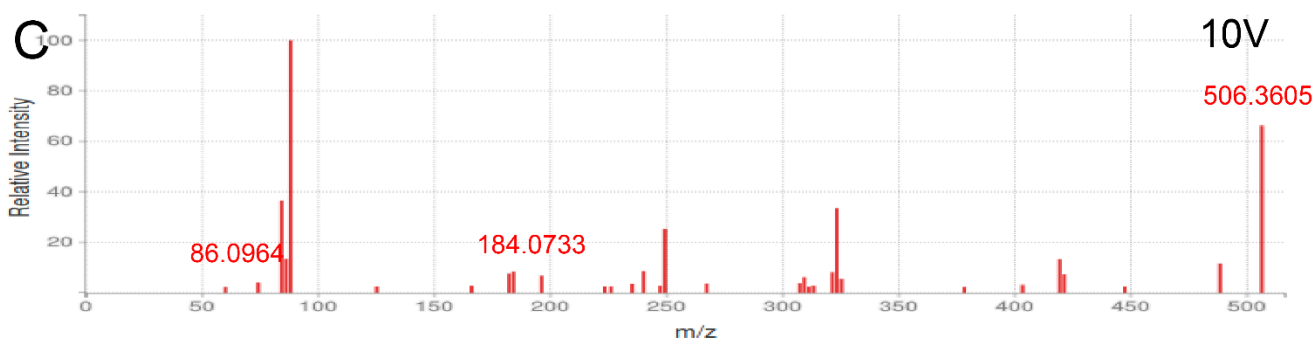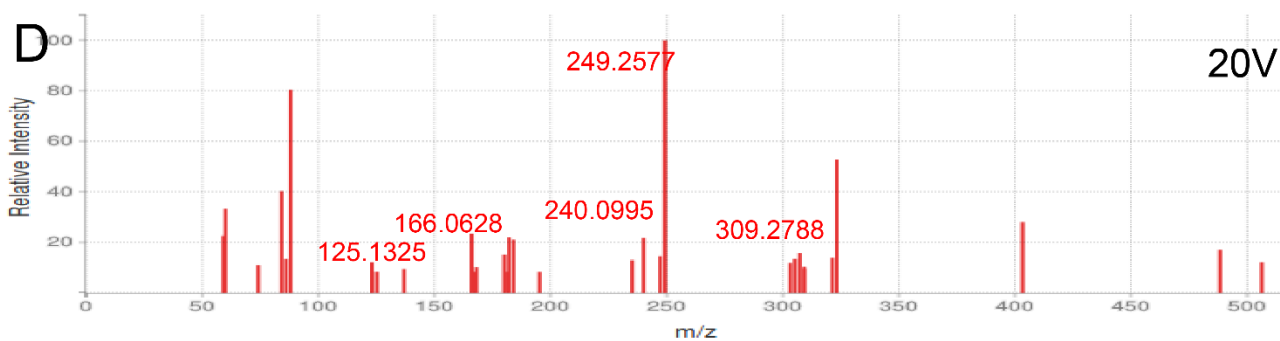

**Figure S12** MS/MS spectra of the identified potential marker LysoPC(p-18:1) (A) and the chromatographic peak of LysoPC(p-18:1) (B). The reference spectra from HMDB database with different voltage 10V (C) and 20V (D).

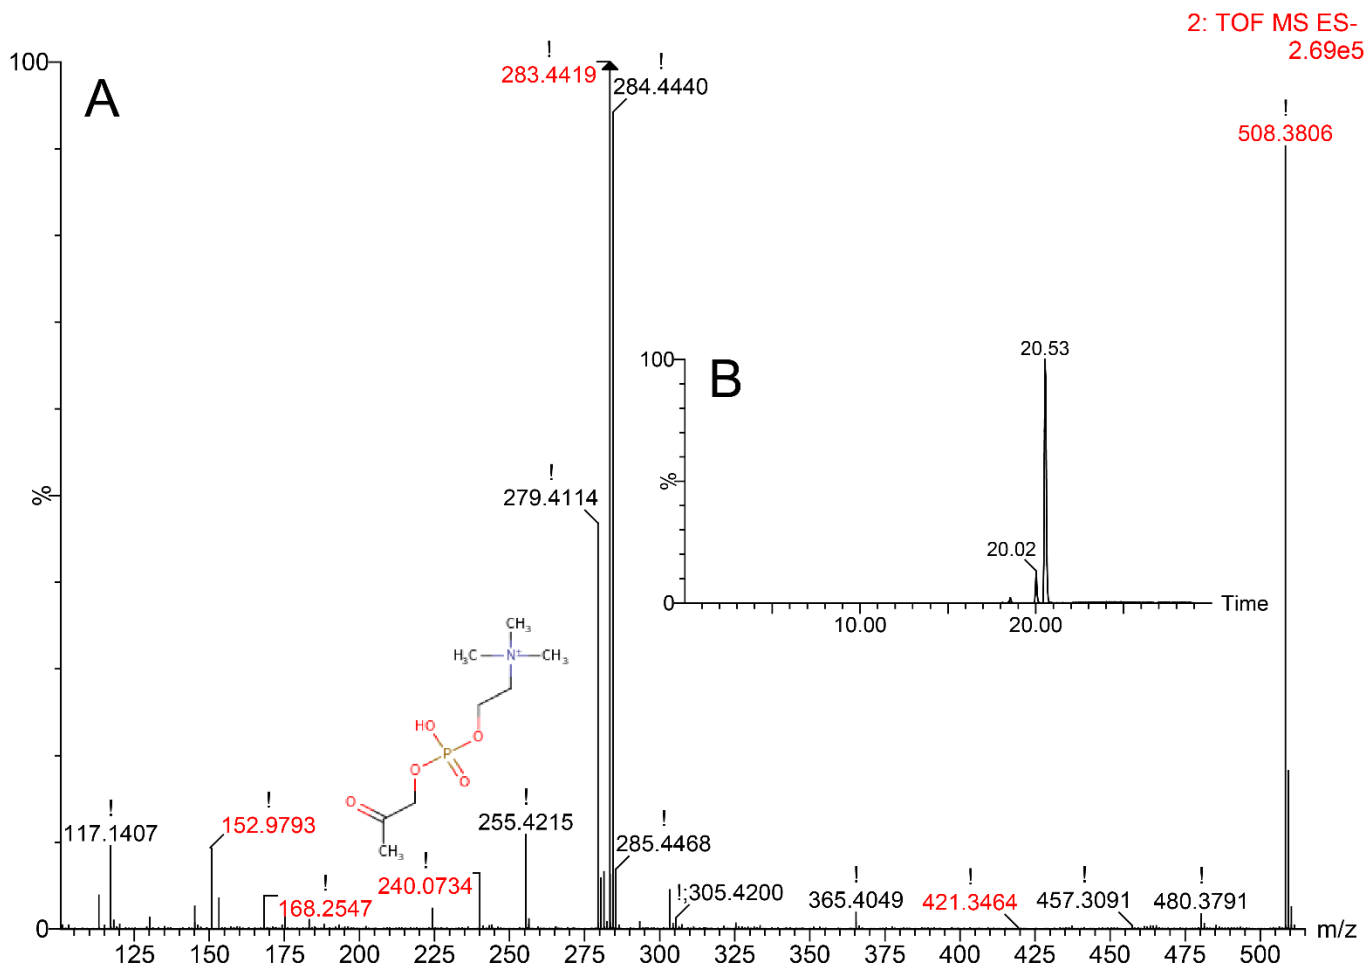

HMDB ID: HMDB0011149  
Compound LysoPC(O-18:0)

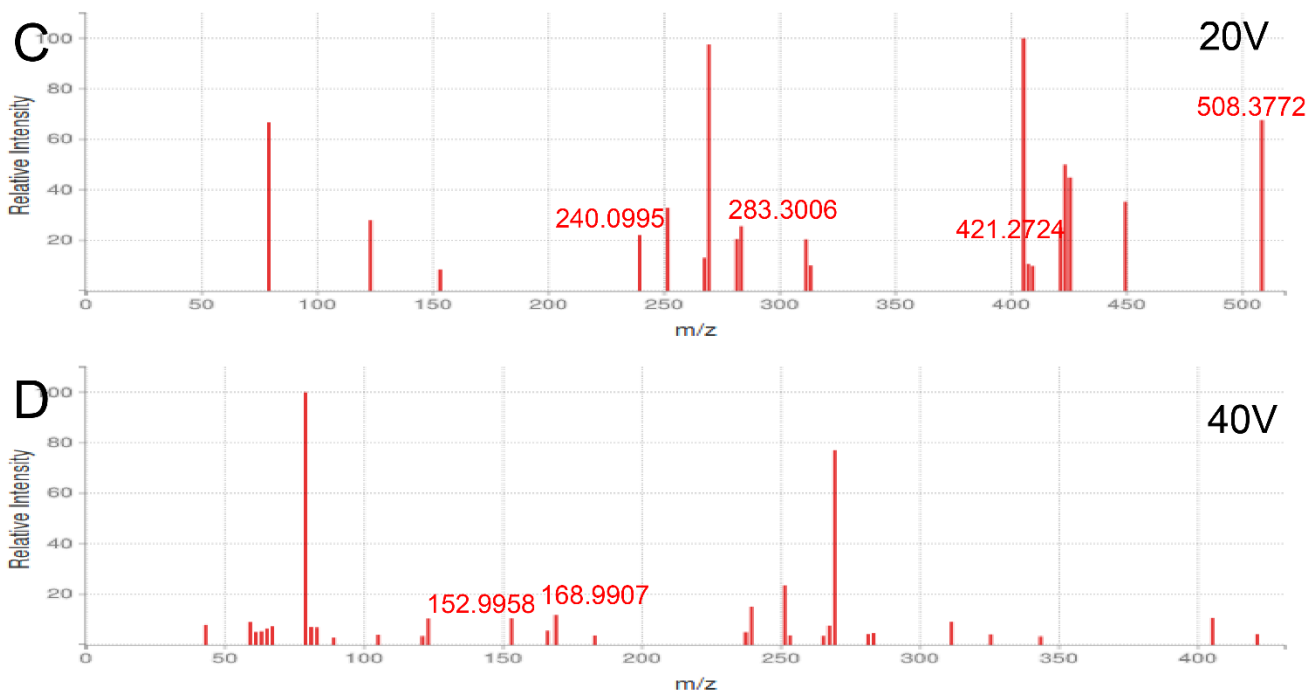

**Figure S13** MS/MS spectra of the identified potential marker LysoPC(o-18:0) (A) and the chromatographic peak of LysoPC(o-18:0) (B). The reference spectra from HMDB database with different voltage 20V (C) and 40V (D).



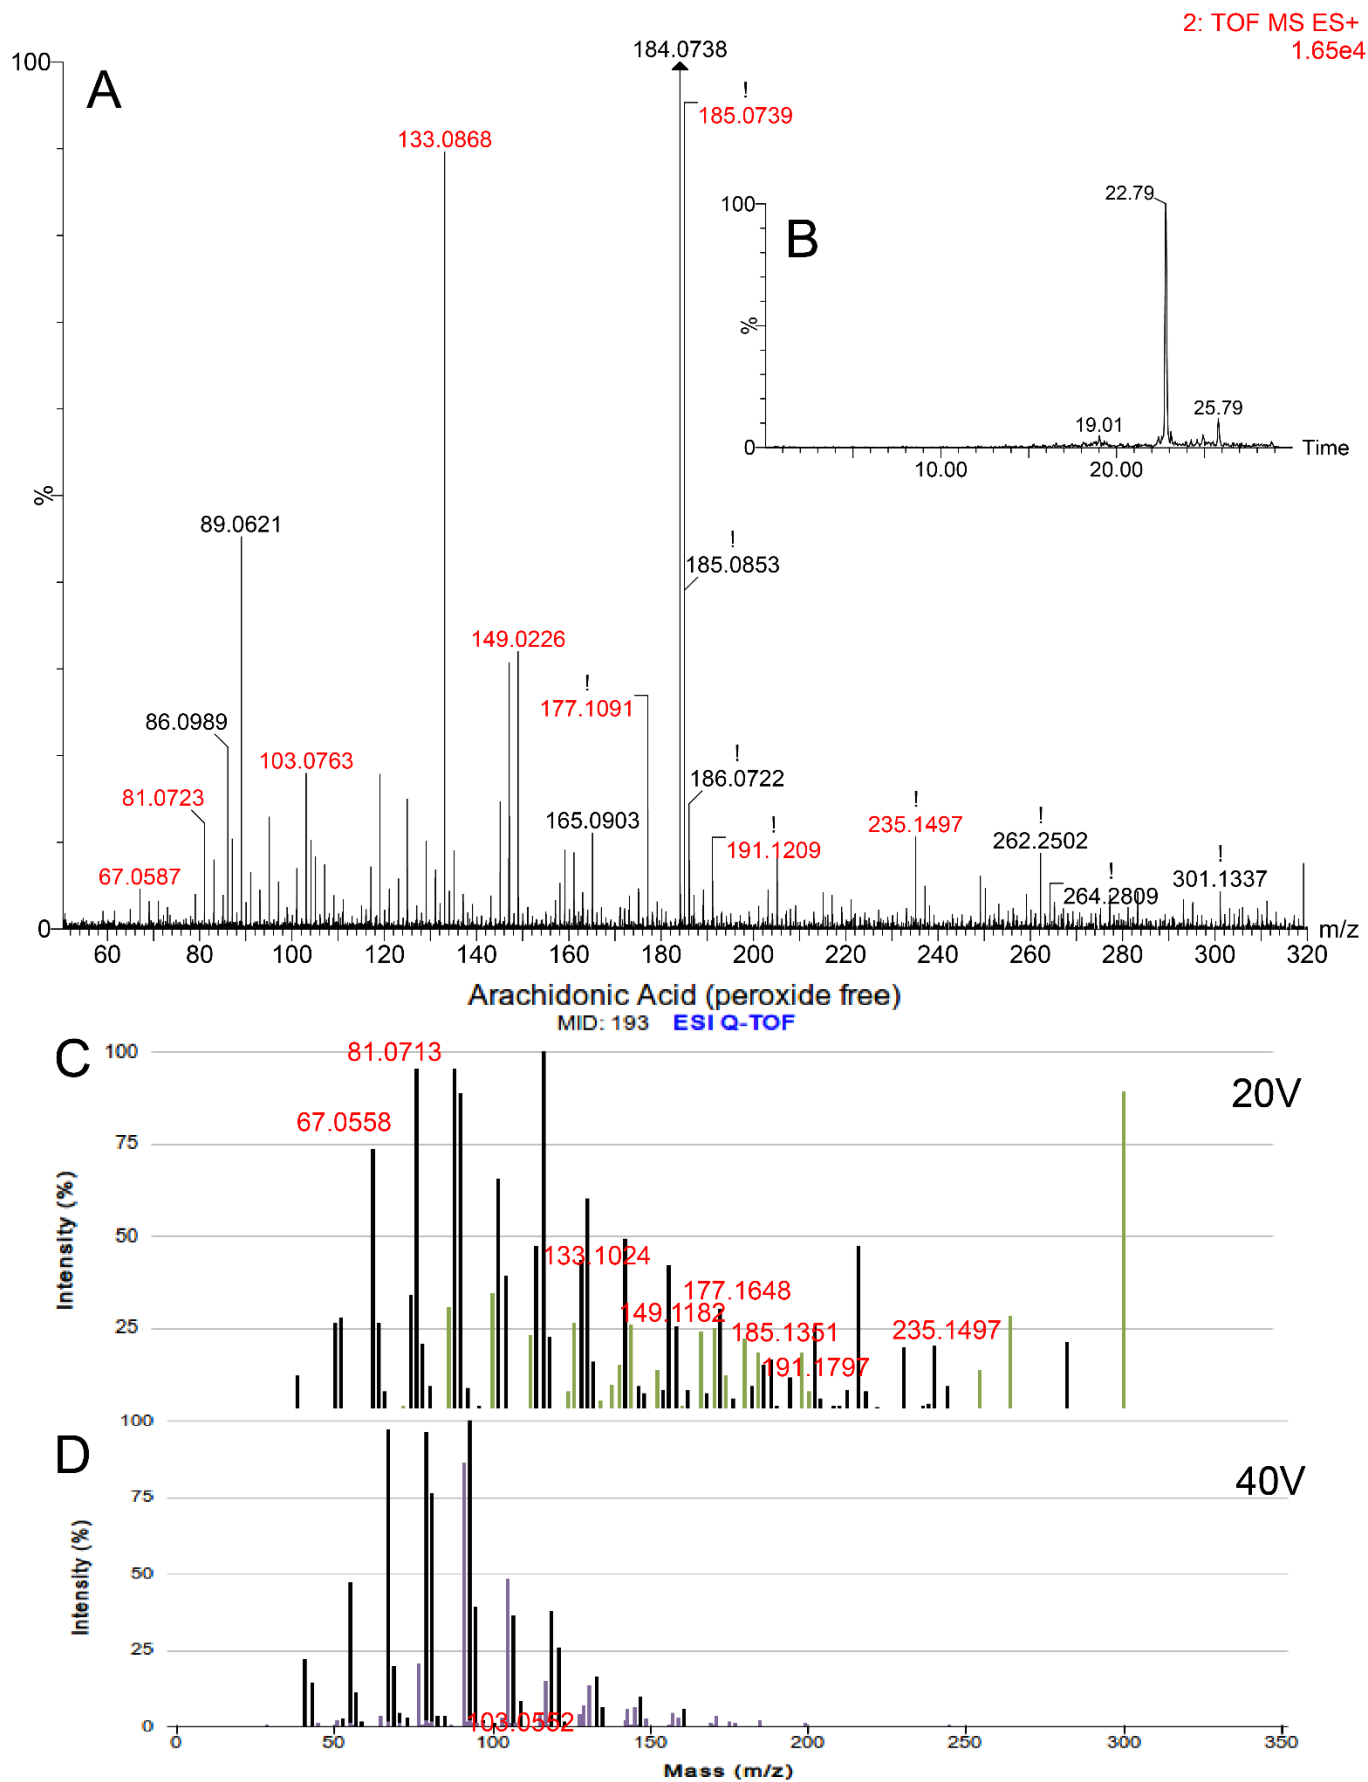

**Figure S14** MS/MS spectra of the identified potential marker Arachidonic acid (A) and the chromatographic peak of Arachidonic acid (B). The reference spectra from METLIN database with different voltage 20V (C) and 40V (D).

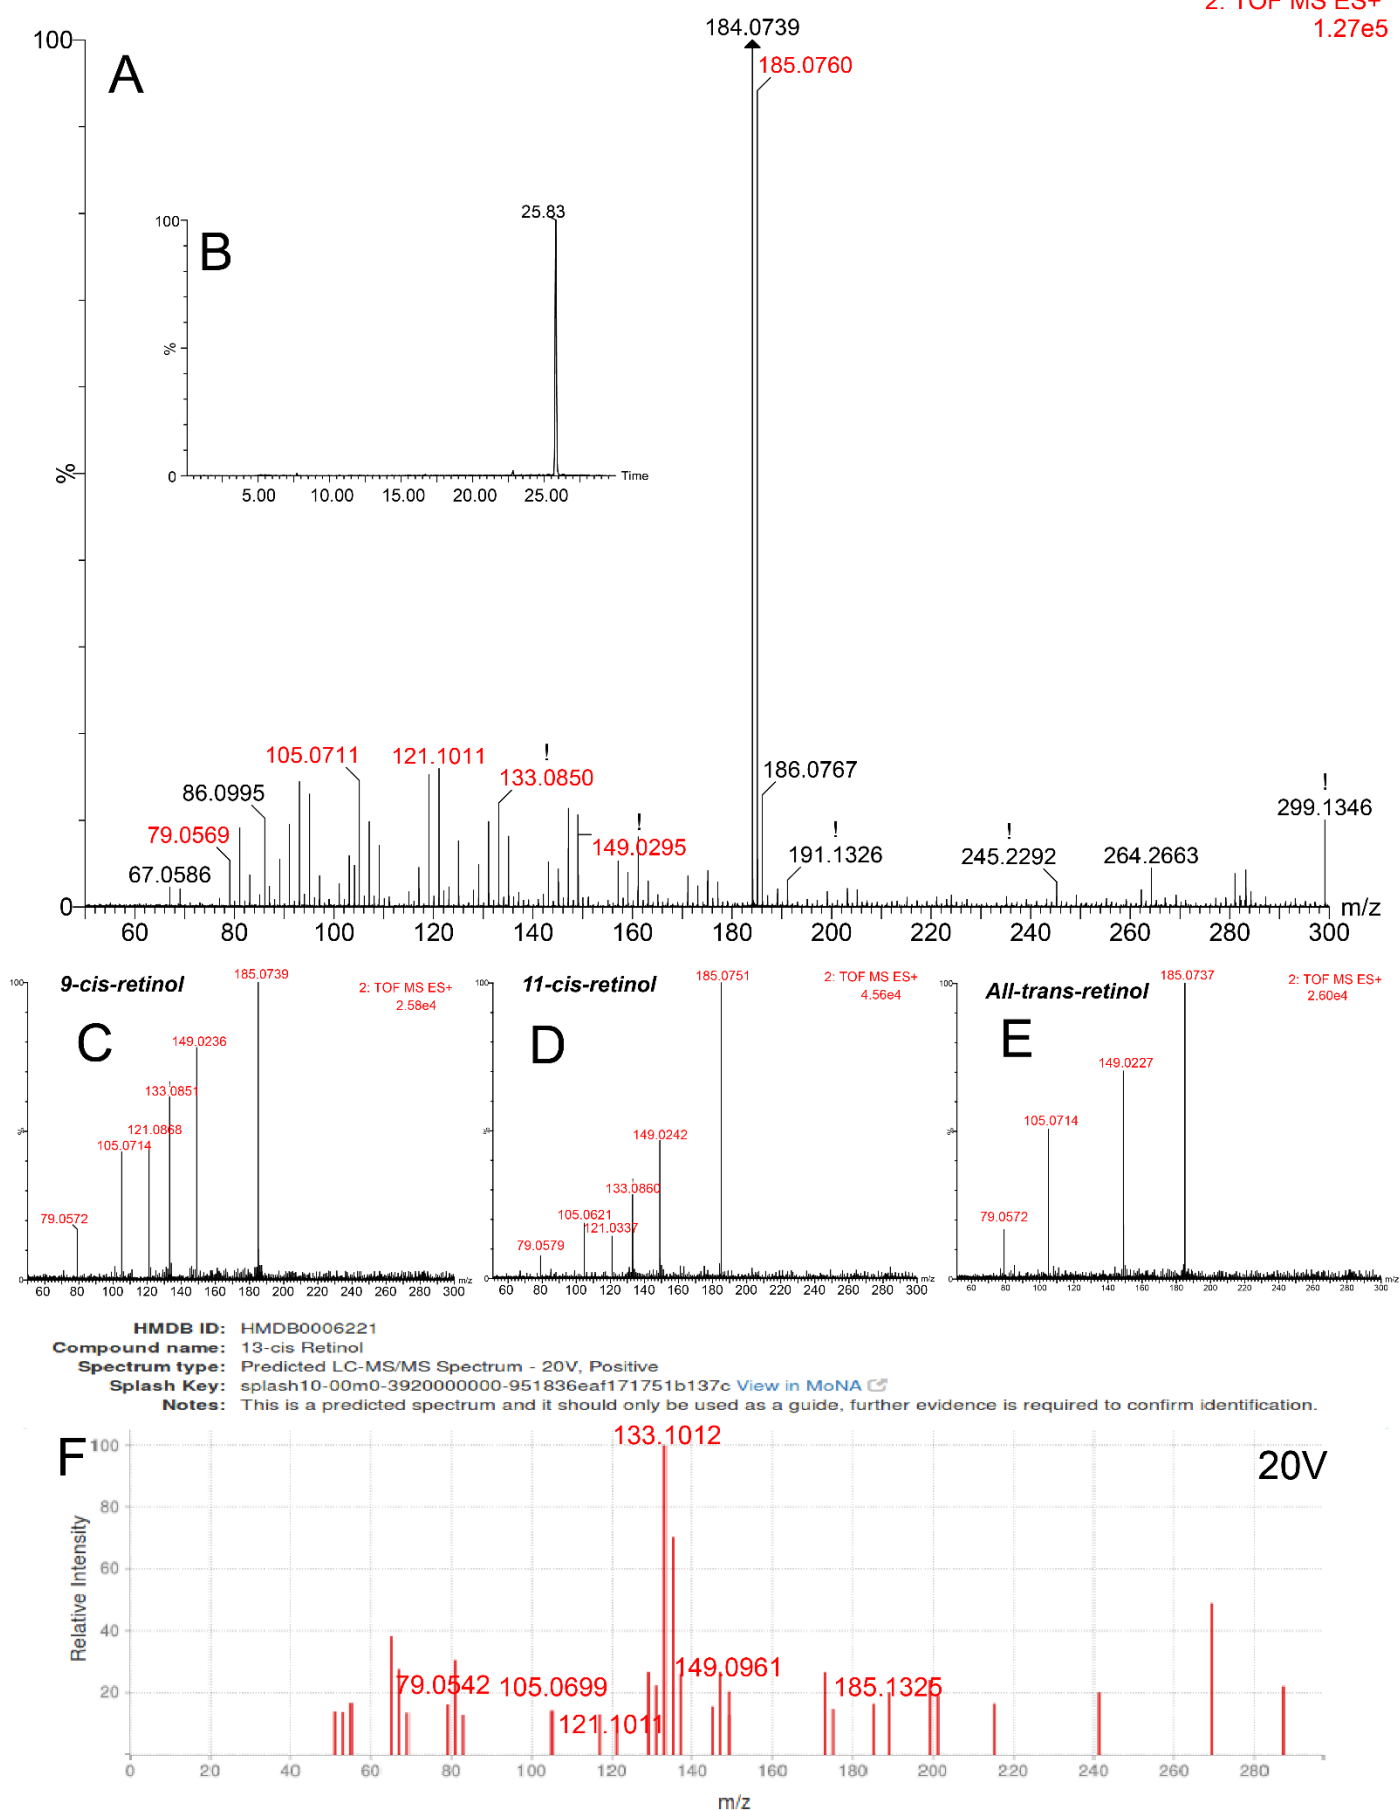

**Figure S15** MS/MS spectra of the identified potential marker Retinols (A) and the chromatographic peak of Retinols (B). The reference standard chemical spectra including 9-cis-retinol (C), 11-cis-retinol (D) and all-trans-retinol (E) in experimental condition. The reference spectra from HMDB database with different voltage 20V (F).

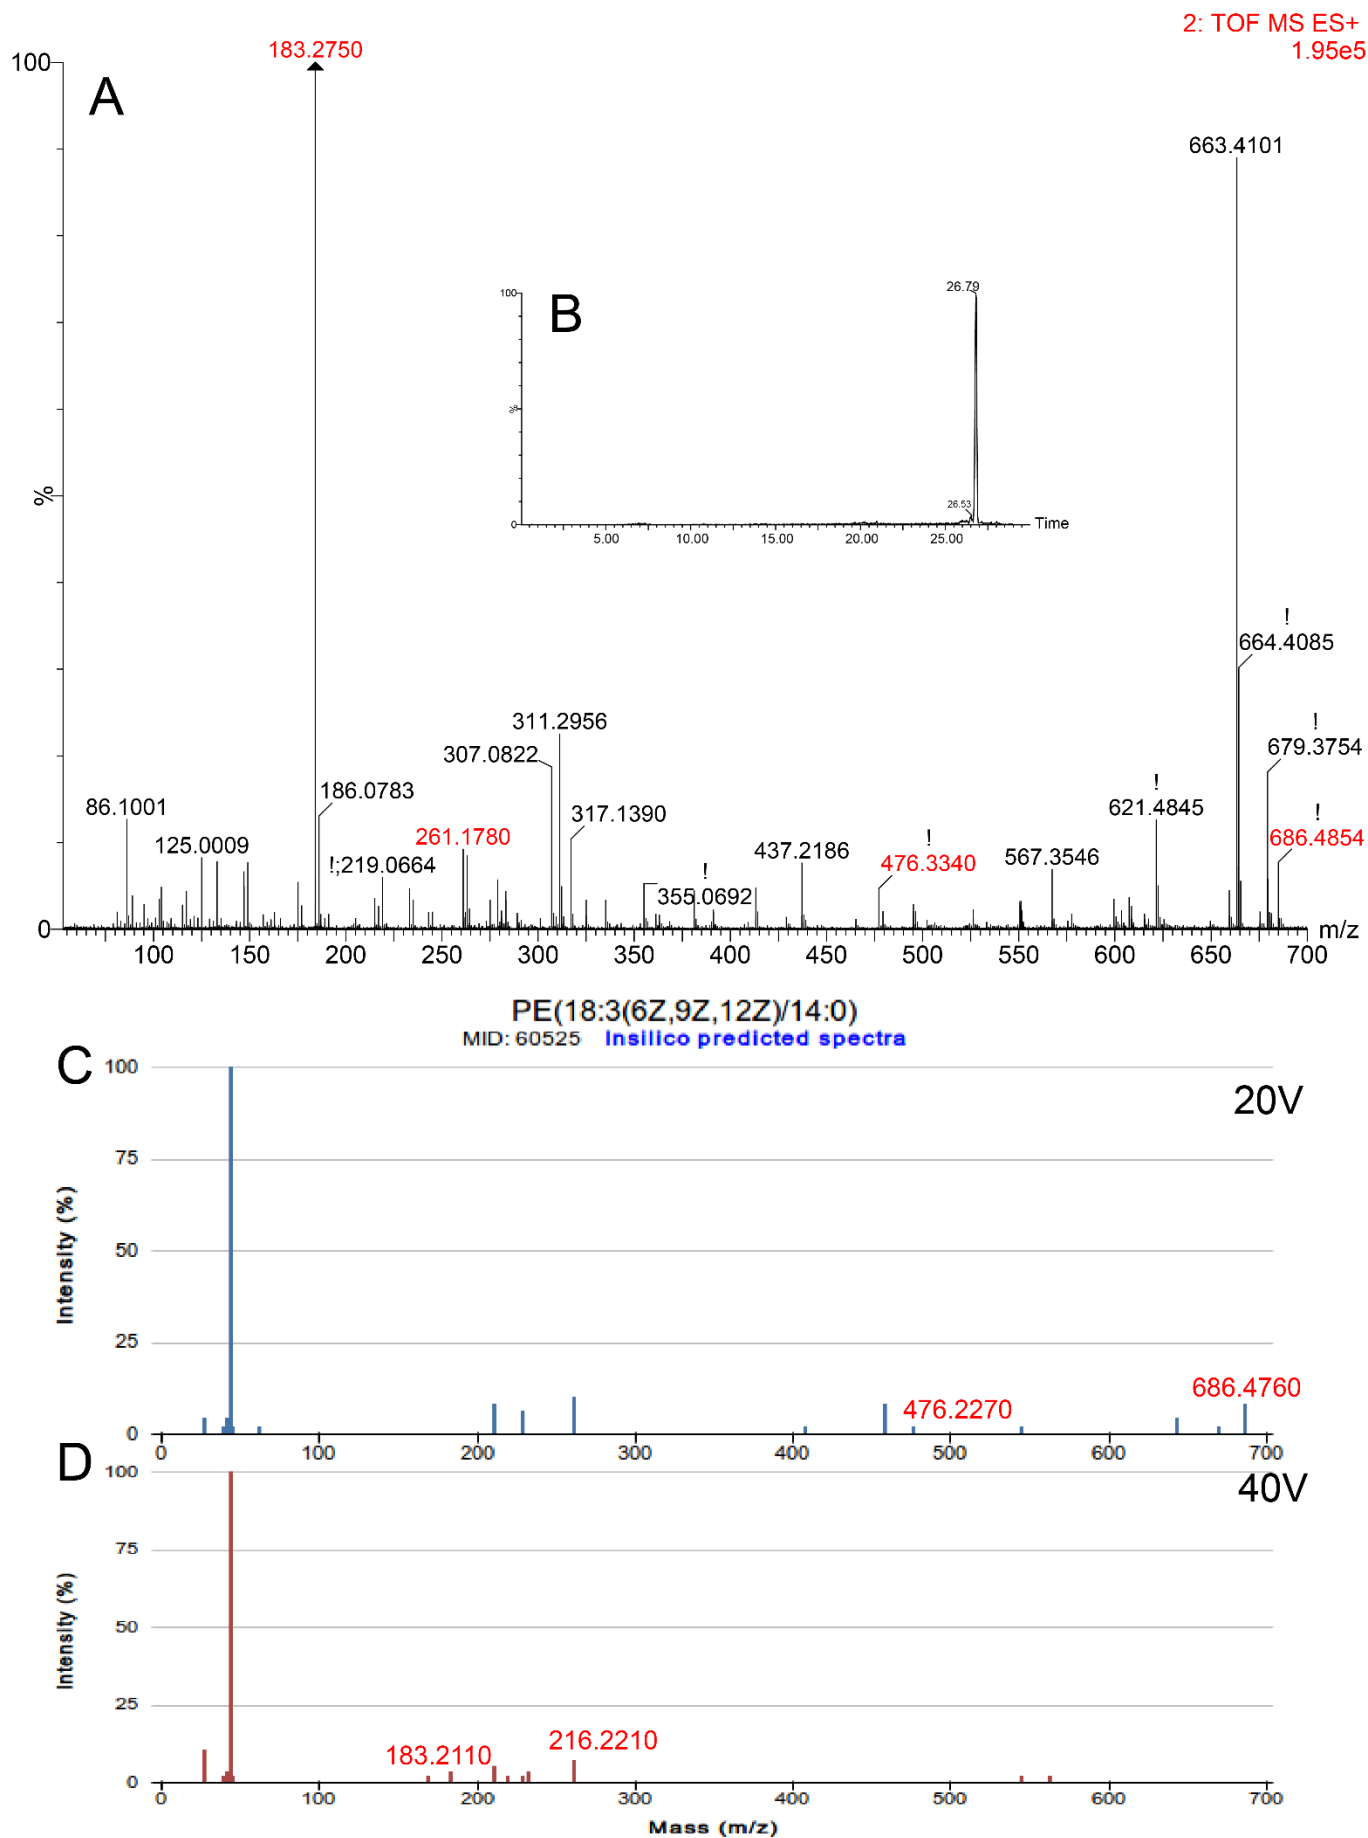

**Figure S16** MS/MS spectra of the identified potential marker PE(18:3/14:0) (A) and the chromatographic peak of PE(18:3/14:0) (B). The reference spectra from METLIN database with different voltage 20V (C) and 40V (D).

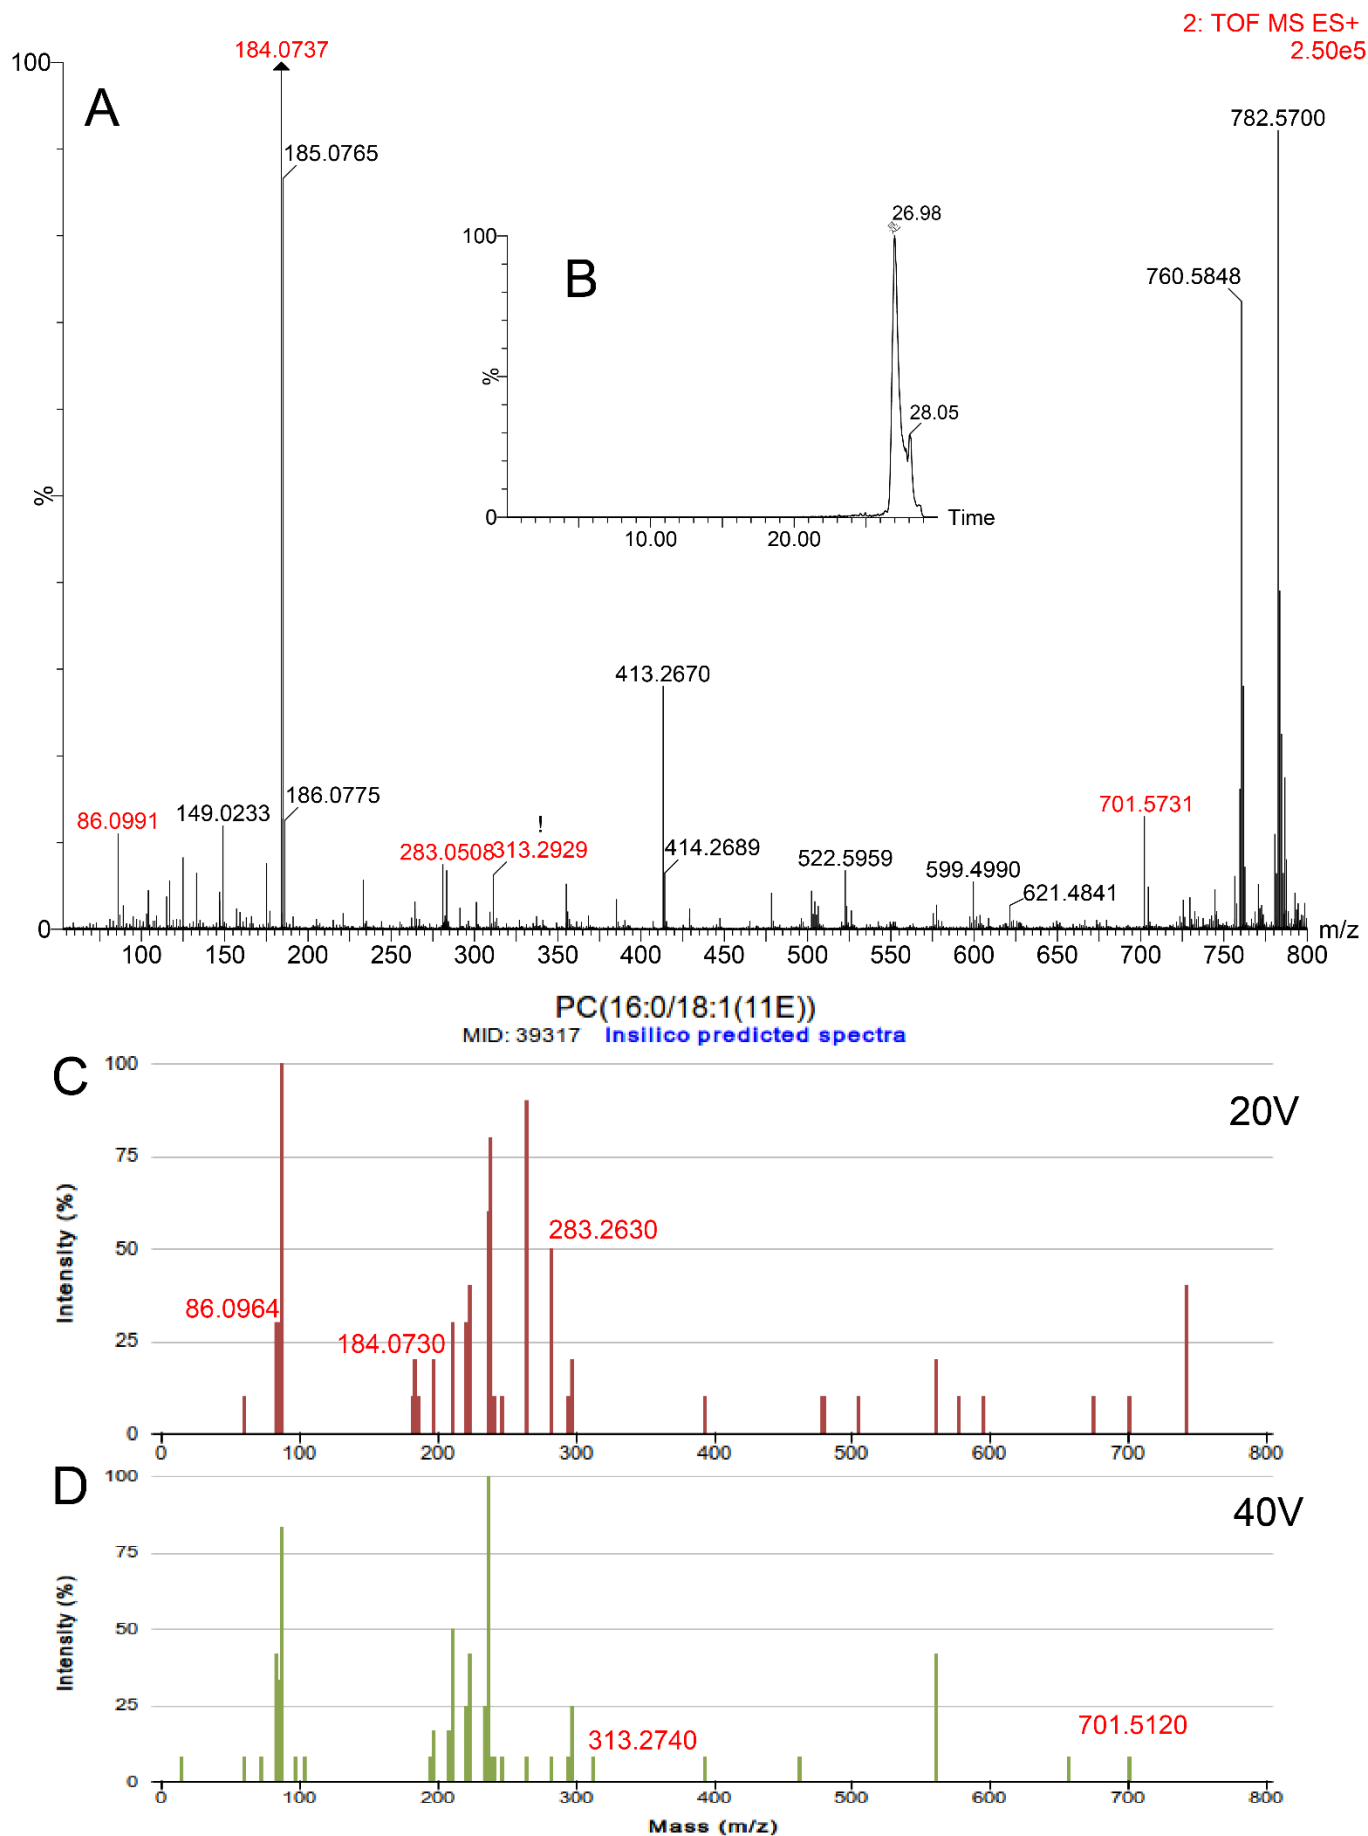

**Figure S17** MS/MS spectra of the identified potential marker PC(16:0/18:1) (A) and the chromatographic peak of PC(16:0/18:1) (B). The reference spectra from METLIN database with different voltage 20V (C) and 40V (D).

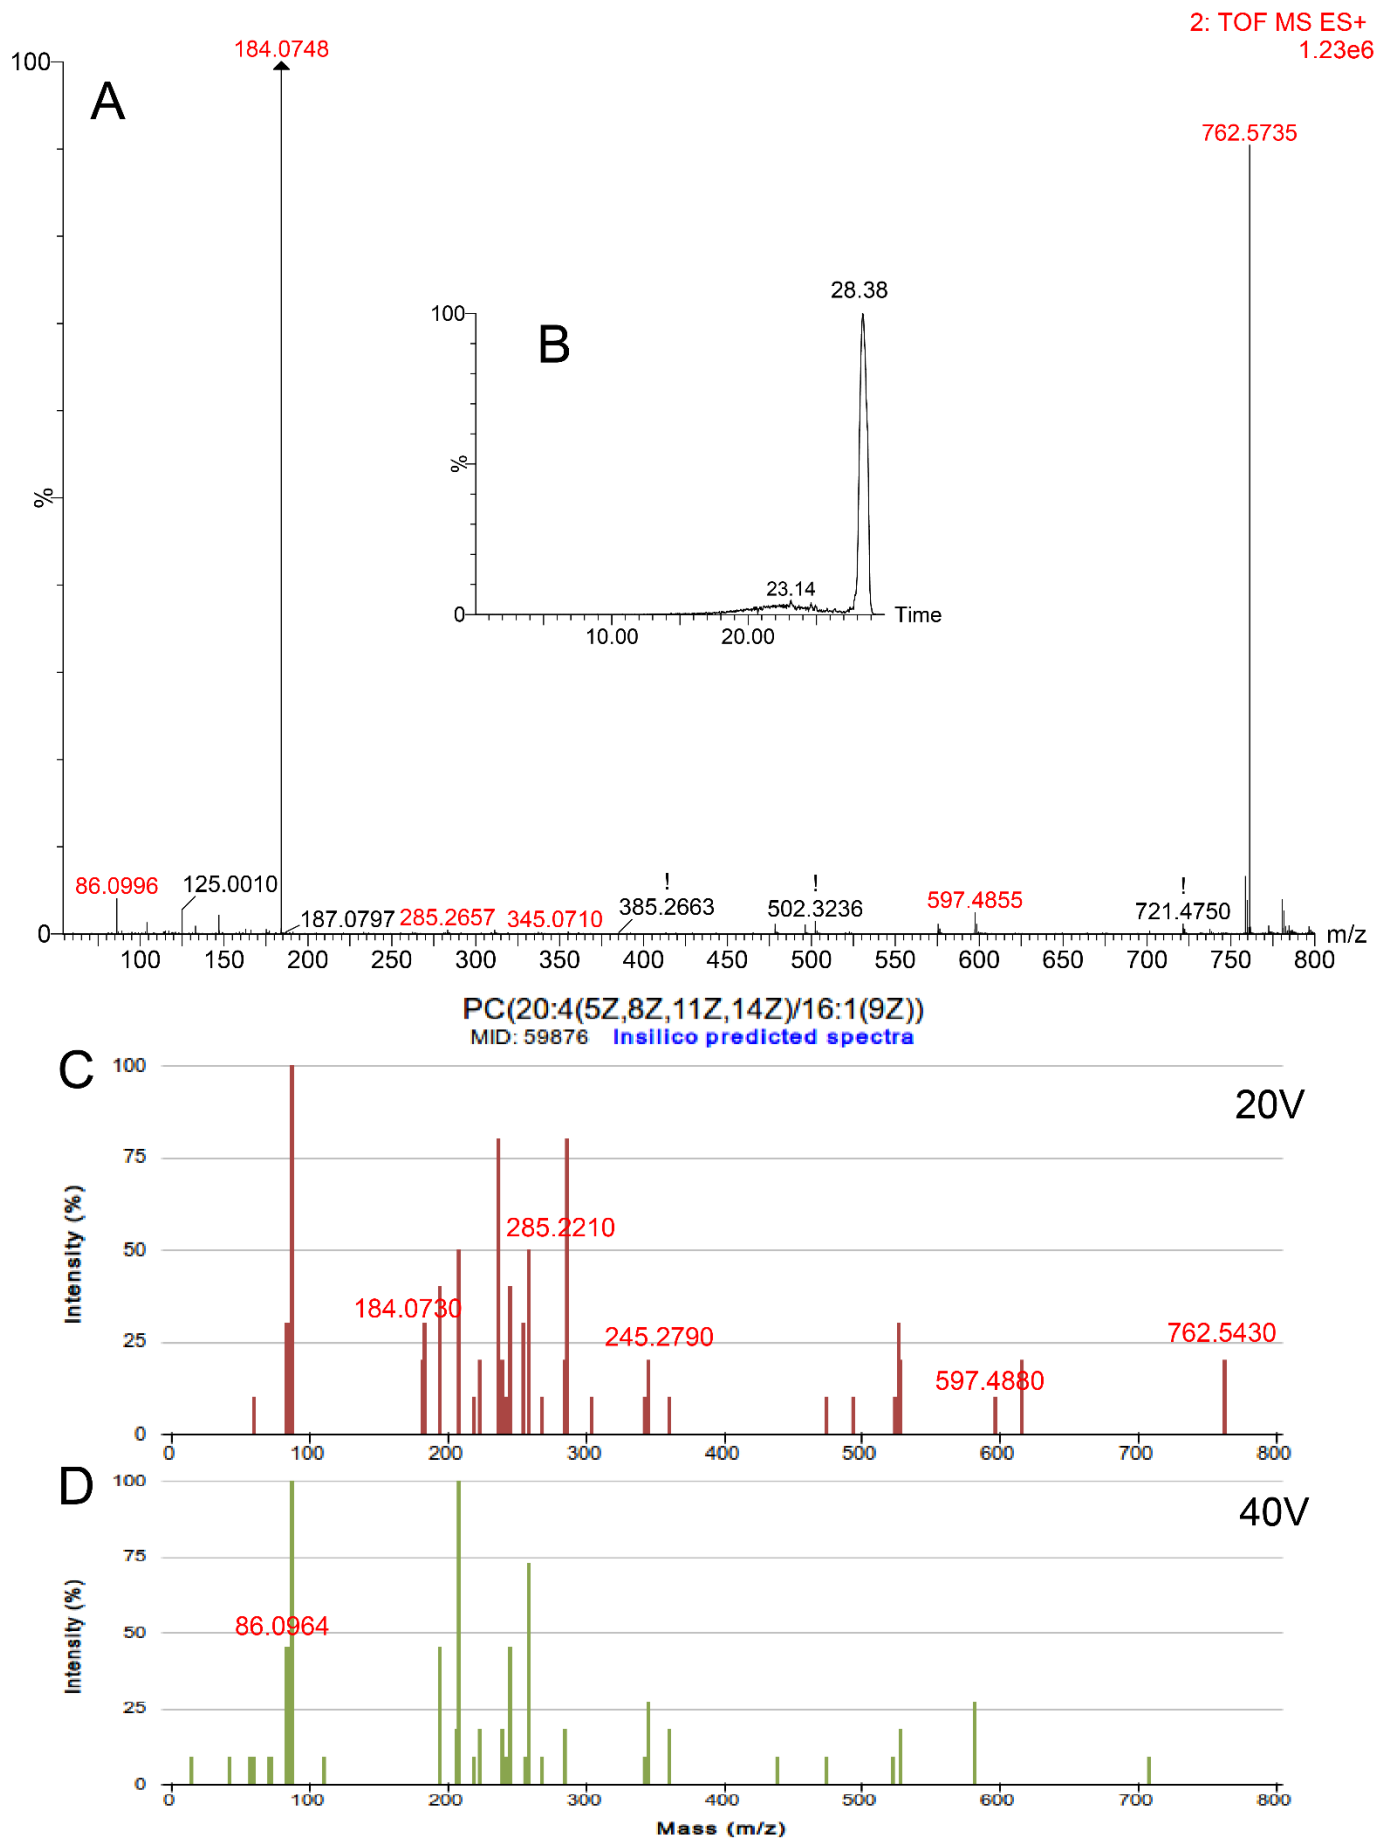

**Figure S18** MS/MS spectra of the identified potential marker PC(20:4/16:1) (A) and the chromatographic peak of PC(20:4/16:1) (B). The reference spectra from METLIN database with different voltage 20V (C) and 40V (D).

**Table S3** Validation results of all OPLS-DA models with leave-1/7-out approach

| OPLS-DA Models                | R2X   | R2Y   | Q2     |
|-------------------------------|-------|-------|--------|
| E vs. N in ESI <sup>+</sup>   | 0.463 | 0.792 | 0.595  |
| E vs. H in ESI <sup>+</sup>   | 0.37  | 0.938 | 0.744  |
| N vs. H in ESI <sup>+</sup>   | 0.403 | 0.773 | 0.557  |
| E&N vs. H in ESI <sup>+</sup> | 0.309 | 0.77  | 0.617  |
| E vs. N in ESI <sup>-</sup>   | 0.227 | 0.773 | -0.141 |
| E vs. H in ESI <sup>-</sup>   | 0.445 | 0.975 | 0.803  |
| N vs. H in ESI <sup>-</sup>   | 0.226 | 0.903 | 0.703  |
| E&N vs. H in ESI <sup>-</sup> | 0.441 | 0.969 | 0.748  |

**Table S4** The Covariation values and Correction values of all metabolites in different OPLS-DA models

| OPLS-DA Model              | Distinct Ion pairs | Covariation Values | Correction Values | VIP Values  | P Values     |
|----------------------------|--------------------|--------------------|-------------------|-------------|--------------|
| ESI <sup>+</sup> E vs. N   | 12.90_318.3010     | 0.118397           | 0.755651          | 7.3805      | 7.05E-05     |
|                            | 0.61_280.0917      | 0.0365028          | 0.667743          | 2.51005     | 0.000326     |
|                            | 15.19_302.3055     | 0.0425538          | 0.474658          | 1.9708      | 0.047694643  |
|                            | 0.70_203.0524      | 0.0509496          | 0.457688          | 2.82332     | 0.042260598  |
|                            | 6.89_842.6057      | 0.0180737          | 0.459206          | 1.990049    | 0.032812373  |
|                            | 25.80_287.2364     | 0.0218074          | 0.370499          | 1.54737     | 0.026802839  |
|                            | 27.99_782.5671     | -0.0574966         | -0.240729         | 1.77642     | 0.030861612  |
|                            | 26.79_686.4818     | -0.0431691         | -0.418987         | 2.62265     | 0.004919327  |
|                            | 11.06_828.5487     | -0.0130426         | -0.278189         | 1.19411     | 0.031048706  |
|                            | 19.18_506.3594     | 0.0231389          | 0.451784          | 1.74855     | 0.005030134  |
| ESI <sup>+</sup> E vs. H   | 12.90_318.3010     | 0.110799           | 0.769561          | 7.22546     | 2.57E-06     |
|                            | 0.70_203.0524      | 0.0466098          | 0.492671          | 3.14518     | 0.003468574  |
|                            | 28.41_780.5483     | 0.0524261          | 0.403466          | 3.3435      | 0.021292274  |
|                            | 15.19_302.3055     | 0.0379276          | 0.562261          | 2.47153     | 0.001230995  |
|                            | 0.61_280.0917      | 0.0348332          | 0.518727          | 2.24336     | 0.002970758  |
|                            | 5.91_860.5206      | 0.0325903          | 0.420746          | 1.76505     | 0.037576389  |
|                            | 25.80_287.2364     | 0.022717           | 0.398422          | 1.44544     | 0.019866047  |
|                            | 19.18_506.3594     | 0.0194385          | 0.376527          | 1.07849     | 0.046083784  |
|                            | 11.06_828.5487     | -0.0103651         | -0.27406          | 1.196258    | 0.0370186502 |
|                            | 26.79_686.4818     | -0.0347006         | -0.430307         | 2.305       | 0.020528406  |
| 18.13_303.2326             | -0.0231564         | -0.584723          | 1.48192           | 0.003613075 |              |
| ESI <sup>+</sup> N vs. H   | 12.90_318.3010     | 0.0790348          | 0.523865          | 4.19433     | 0.017677456  |
|                            | 0.70_203.0524      | 0.0407588          | 0.439684          | 2.10069     | 0.045296037  |
|                            | 5.91_860.5206      | 0.0214799          | 0.234317          | 2.1022      | 0.043300929  |
|                            | 28.41_780.5483     | 0.0143576          | 0.0993949         | 2.29905     | 0.012033582  |
|                            | 19.18_506.3594     | 0.00706233         | 0.120437          | 1.247319    | 0.03872105   |
|                            | 26.79_686.4818     | -0.0151133         | -0.267019         | 1.06049     | 0.042588939  |
|                            | 22.81_305.2452     | -0.0162656         | -0.470859         | 1.18809     | 0.003826242  |
|                            | 18.13_303.2326     | -0.0268681         | -0.539498         | 1.85449     | 0.002459153  |
| ESI <sup>+</sup> E&N vs. H | 12.90_318.3010     | 0.115972           | 0.730819          | 6.31695     | 7.82E-05     |
|                            | 0.70_203.0524      | 0.054102           | 0.525604          | 2.85482     | 0.005944511  |
|                            | 15.19_302.3055     | 0.0414287          | 0.507473          | 2.01367     | 0.013255539  |
|                            | 5.99_585.3700      | 0.0228178          | 0.493404          | 1.73643     | 0.002806233  |
|                            | 0.61_280.0917      | 0.036278           | 0.511807          | 2.23269     | 0.016244953  |
|                            | 5.91_860.5206      | 0.0229462          | 0.252635          | 2.07668     | 0.020295391  |
|                            | 16.65_544.3407     | -0.0471518         | -0.247716         | 3.04717     | 0.048562618  |
|                            | 27.99_782.5671     | -0.0653799         | -0.332702         | 3.39075     | 0.018890372  |
|                            | 26.79_686.4818     | -0.0338479         | -0.391856         | 1.75472     | 0.010120433  |
|                            | 11.06_828.5487     | -0.00943672        | -0.222903         | 1.340619    | 0.027514478  |
| ESI E&N vs. H              | 20.06_508.3861     | -0.0805057         | -0.513899         | 3.19995     | 0.000395723  |
